1 **TITLE**

2 Interspecies transfer of syntenic *RAMOSAI* orthologs and promoter *cis* sequences impacts maize  
3 inflorescence architecture

4

5 **AUTHOR LIST**

6 Josh Strable<sup>1,2,†</sup>, Erica Unger-Wallace<sup>1,†</sup>, Alejandro Aragón Raygoza<sup>2</sup>, Sarah Briggs<sup>1</sup> and Erik  
7 Vollbrecht<sup>1,‡</sup>

8

9 **AUTHOR AFFILIATIONS**

10 1. Department of Genetics, Development and Cell Biology, Iowa State University, Ames, IA  
11 50011

12 2. Department of Molecular and Structural Biochemistry, North Carolina State University,  
13 Raleigh, NC, USA 27695

14 †. These authors contributed equally to this work.

15

16 **CORRESPONDENCE**

17 ‡. Corresponding author: Erik Vollbrecht ([vollbrec@iastate.edu](mailto:vollbrec@iastate.edu))

18

19 **ORCID ID**

20 0000-0002-0260-8285 (J.S.); 0000-0002-2248-9877 (E.U.-W.); 0000-0001-7682-8718 (A.A.R.);

21 0000-0003-4919-1365 (E.V.)

22

23 **KEYWORDS**

24 Maize, *Zea mays*, Sorghum, *Sorghum bicolor*, *Setaria viridis*, Inflorescence, Interspecies Gene

25 Transfer

26 **ABSTRACT**

27 Grass inflorescences support floral structures that each bear a single grain, where variation in  
28 branch architecture directly impacts yield. The maize RAMOSA1 (*ZmRA1*) transcription factor  
29 acts as a key regulator of inflorescence development by imposing branch meristem determinacy.  
30 Here, we show *RAI* transcripts accumulate in boundary domains adjacent to spikelet meristems  
31 in *Sorghum bicolor* (*Sb*) and *Setaria viridis* (*Sv*) inflorescences similar as in the developing  
32 maize tassel and ear. To evaluate functional conservation of syntenic *RAI* orthologs and  
33 promoter *cis* sequences in maize, sorghum and setaria, we utilized interspecies gene transfer and  
34 assayed genetic complementation in a common inbred background by quantifying recovery of  
35 normal branching in highly ramified *ral-R* mutants. A *ZmRAI* transgene that includes  
36 endogenous upstream and downstream flanking sequences recovered normal tassel and ear  
37 branching in *ral-R*. Interspecies expression of two transgene variants of the *SbRAI* locus,  
38 modeled as the entire endogenous tandem duplication or just the non-frameshifted downstream  
39 copy, complemented *ral-R* branching defects and induced novel fasciation and branch patterns.  
40 The *SvRAI* locus lacks conserved, upstream noncoding *cis* sequences found in maize and  
41 sorghum; interspecies expression of an *SvRAI* transgene did not or only partially recovered  
42 normal inflorescence forms. Driving expression of the *SvRAI* coding region by the *ZmRAI*  
43 upstream region, however, recovered normal inflorescence morphology in *ral-R*. These data  
44 leveraging interspecies gene transfer suggest that *cis*-encoded temporal regulation of *RAI*  
45 expression is a key factor in modulating branch meristem determinacy that ultimately impacts  
46 grass inflorescence architecture.

## 47 INTRODUCTION

48 Understanding the genetic basis of morphological diversity between and within species is a key  
49 objective in biology (Carroll, 2008). Grass (Poaceae) inflorescences display tremendous intra-  
50 and interspecific variation (ref. Kellogg, 2015) and are an effective model for studying genetic  
51 mechanisms that underly evolutionary change in morphology. Inflorescence diversity is well-  
52 documented in the cereal crops rice (*Oryza* spp.) (Yamaki et al., 2010; Crowell et al., 2016),  
53 millet (*Setaria* spp.) (Doust and Kellogg, 2002; Doust et al., 2005; Huang and Feldman, 2017),  
54 sorghum (*Sorghum* spp.) (Harlan and de Wet, 1972; Brown et al., 2006; Zhou et al., 2019; Li et  
55 al., 2020) and maize (*Zea mays* ssp.) (Upadyayula et al., 2006a; Upadyayula et al., 2006b;  
56 Brown et al., 2011; Wu et al., 2016; Xu et al., 2017). As inflorescences in the Poaceae ultimately  
57 support reproduction and the floral structures that bear a single grain, variation in inflorescence  
58 morphology directly impacts yield in cereal crops and weedy grass species. Despite such  
59 agronomical and ecological significance, the genes that underlie diverse inflorescence forms in  
60 the grasses have not been fully elucidated, and tests of functional conservation of syntenic  
61 orthologous genes are limited.

62 Mature inflorescence traits are patterned early in development through variation in size,  
63 identity, and the timing and duration of maturation schedules of active pluripotent stem cell  
64 tissues called meristems. These variations impact the number, arrangement and elaboration of  
65 lateral organs that arise from meristems (Doust and Kellogg, 2002; Vollbrecht et al., 2005;  
66 Prusinkiewicz et al., 2007; Whipple et al., 2010; Kellogg et al., 2013; Lemmon et al., 2016; Zhu  
67 et al., 2018; Leiboff and Hake, 2019). A general framework for ontogeny of grass inflorescences  
68 (Kellogg et al., 2013) follows: When internal and external cues signal the reproductive transition,  
69 inflorescence development ensues as a vegetative shoot apical meristem, which elaborates leaf  
70 primordia at its flanks, converts to a reproductive inflorescence meristem (IM) that elaborates  
71 lateral meristems at its flanks. The IM is indeterminate, i.e. capable of producing an unspecified  
72 number of lateral primordia, and the lateral meristems can be either relatively indeterminate in  
73 which case they may also initiate additional lateral meristems, or relatively determinate  
74 (producing a specified number of lateral primordia). Indeterminate grass inflorescence meristems  
75 are called branch meristems (BMs) and show diverse indeterminacy across and even within grass  
76 species, while all grass inflorescences ultimately produce determinate meristems called spikelet  
77 meristems (SMs). Thus, in the general framework IMs initiate BMs, and both IMs and BMs

78 initiate SMs at their flanks. A SM gives rise to two glume (bract) primordia, followed by one or  
79 multiple florets which altogether comprise the spikelet, the central unit of a grass inflorescence  
80 (Clifford, 1987). SMs in some grass species are more determinate in that they terminate by  
81 converting to a floral meristem that is consumed in the production of floral organs, whereas in  
82 other species SMs are somewhat indeterminate and produce multiple floral meristems, and  
83 therefore multiple florets, before terminating. Diverse morphological complexity among grass  
84 inflorescences arises through variation in type, activity and determinacy of IMs, BMs and SMs.

85 The family Poaceae consists of over 11500 species (Kellogg, 2015) distributed about  
86 equally among two major lineages known as the PACMAD and BOP clades. In the PACMAD  
87 clade, the largest subfamily Panicoideae has over 3300 species that include global staple cereal  
88 crops maize (*Zea mays ssp mays*), sorghum (*Sorghum bicolor* [L.] Moench), and foxtail millet  
89 (*Setaria italica*) (Kellogg, 2015). Maize and sorghum are among the ~1200 species in tribe  
90 Andropogoneae; *Setaria* is in the tribe Paniceae (Kellogg, 2015). Unlike most of the Panicoideae  
91 where spikelets are unpaired, the Andropogoneae are distinguished by producing their spikelets  
92 in pairs; specialized, determinate BMs called spikelet pair meristems (SPMs) each produce two  
93 SMs. Thus, spikelet pairs (SPs) and long branches (LBs), which commonly coexist in the same  
94 inflorescence, are branches that differ by length (short vs. long, respectively) and meristem  
95 determinacy at origin (SPMs vs. BMs, respectively). By contrast, within the tribe Paniceae or the  
96 ‘bristle clade’ are a few hundred grass species including the foxtail millet progenitor *Setaria*  
97 *viridis* where adjacent meristems differentiate into either single spikelets or sterile branches  
98 called bristles (Doust and Kellogg, 2002, Hodge and Doust, 2017). Developmental and  
99 morphological studies in *Setaria* lend support to the ontogenetic pairing of a single spikelet with  
100 a bristle, but spikelets are not paired (Doust and Kellogg, 2002).

101 Maize and sorghum are estimated to have diverged from a common ancestor  
102 approximately 12 million years ago (MYA) (Swigonová et al., 2014); *Setaria* diverged from  
103 maize and sorghum approximately 26-27 MYA (Bennetzen et al., 2012; Zhang et al., 2012).  
104 Sorghum and *Setaria* genomes show extensive synteny (Bennetzen et al., 2012; Zhang et al.,  
105 2012). Likewise, approximately 60% of annotated genes are syntenically conserved between  
106 maize and sorghum, and this gene set accounts for 90% of all genes characterized by forward  
107 genetics in maize (Schnable and Freeling, 2011; Schnable, 2015). Syntenic orthologs are more  
108 likely to retain consistent patterns of gene regulation and expression across related species

109 (Davidson et al., 2012), and may be more likely to retain ancestral functional roles than non-  
110 syntenic gene copies (Dewey, 2011). However, to date, functional conservation between syntenic  
111 orthologs in related grass species remains widely untested.

112 The maize *RAMOSAI* (*ZmRAI*) locus is a key regulator of tassel and ear development  
113 and morphology (Vollbrecht et al., 2005). *ZmRAI* was a target of selection during maize  
114 domestication (Sigmon and Vollbrecht, 2010), co-localizes with nucleotide polymorphisms for  
115 inflorescence branching traits in genome wide association studies of diverse maize breeding lines  
116 (Brown et al., 2011; Wu et al., 2016; Xu et al., 2017) and is a candidate quantitative trait locus  
117 for tassel branch number in the Mexican highland maize landrace Palomero Toluqueño (Perez-  
118 Limón et al., 2021). Strong maize *rai* mutants were recognized over a century ago as resembling  
119 inflorescences of other grasses (Collins, 1917), and more recently, comparisons to the complexly  
120 branched sorghum panicle have been drawn at developmental and molecular levels (Vollbrecht  
121 et al., 2005; Leiboff and Hake, 2019). Whereas normal inflorescence branching in maize  
122 produces only SPs or LBs bearing SPs, mutations in *ZmRAI* relax the determinacy normally  
123 imposed on SPMs such that SPs are replaced by LBs bearing several unpaired, single spikelets  
124 ("spikelet multimers"), or by LBs bearing a mix of single and/or paired spikelets (Vollbrecht et  
125 al., 2005). The graded, multiple orders of inflorescence branching in *rai* mutants reveal a general  
126 determinacy function of *ZmRAI* in addition to or that includes a specific role for *ZmRAI* activity  
127 in producing the canonical SP. *RAI* encodes a C<sub>2</sub>H<sub>2</sub> zinc-finger transcription factor with EAR  
128 repression motifs (Vollbrecht et al., 2005). Mutations in the maize C<sub>2</sub>H<sub>2</sub> zinc-finger domain or  
129 C-terminal EAR motif result in severe *rai* mutants that display highly ramified tassels and ears  
130 (Vollbrecht et al., 2005; Gallavotti et al., 2010). One mechanism by which *RAI* imposes SPM  
131 determinacy in maize is through genetic and physical interactions with the orthologous  
132 TOPLESS co-repressor encoded by *RAI ENHANCER LOCUS2 (REL2)* (Gallavotti et al., 2010).  
133 *ZmRAI* transcripts and *ZmRAI* protein accumulate in a boundary domain between the  
134 inflorescence or branch axis and the determinate meristems it regulates (Vollbrecht et al., 2005;  
135 Eveland et al., 2014). The non-cell-autonomous nature of *ZmRAI* suggests that it regulates a  
136 trafficable signal for meristem determinacy, or its gene product is capable of trafficking to the  
137 adjacent meristem (Vollbrecht et al., 2005). Genetic and molecular data support that *RAI*  
138 expression in maize impacts branch complexity through regulating SPM determinacy (Vollbrecht  
139 et al., 2005). Variation in timing of *RAI* expression, presumably imposed by variation in

140 promoter *cis* sequences, in *Miscanthus* (Vollbrecht et al., 2005), sorghum (Vollbrecht et al.,  
141 2005; Leiboff and Hake, 2019) and *S. viridis* (Zhu et al., 2018) correlates with degree of branch  
142 activity and distinct inflorescence morphologies. Thus, heterochronic *RAI* expression and  
143 regulation of *RAI* activity are hypothesized to impact inflorescence branching directly by  
144 modulating meristem determinacy. To date, *ral* mutants have not been reported outside of  
145 maize, leaving open the question of *RAI* function in the Panicoideae with respect to  
146 evolutionarily and agronomically important characters such as meristem determinacy, branch  
147 length and pairing of spikelets.

148 Here, we report on genetic tests for functional conservation of syntenic orthologous *RAI*  
149 genes in maize, sorghum and setaria. We show that *RAI* expression marks boundary domains  
150 adjacent to meristems in sorghum and setaria inflorescences in concordance with *RAI* transcript  
151 accumulation in maize. We generated *RAI* transgenes from maize (*Zm*), sorghum (*Sb*) and  
152 setaria (*Sv*) loci and utilized the strong maize *ral-R* mutant to investigate the impact of  
153 expressing *ZmRAI*, *SbRAI* and *SvRAI* transgenes on the regulation of branching in maize tassels  
154 and ears. Expression as a transgene of *ZmRAI* including flanking upstream and downstream  
155 sequences recovered normal inflorescence morphologies in *ral-R* mutants. Interspecies  
156 expression of two transgene variants of the *SbRAI* locus, one modeled as the entire endogenous  
157 tandem duplication and the other as only the non-frameshifted downstream gene copy, yielded a  
158 range of *ral-R* inflorescence architectures, showing partial recovery with or without novel  
159 branch patterns and fasciation. We found that interspecies expression of an *SvRAI* transgene,  
160 which lacks *cis*-promoter sequences conserved in maize, sorghum and other Andropogoneae  
161 species, either not at all or only partially recovered normal inflorescence forms in *ral-R* mutants,  
162 whereas fusing the *SvRAI* coding region to the *ZmRAI* upstream region recovered normal  
163 inflorescence morphology in *ral-R* mutants. Our functional tests of *RAI* sufficiency indicate that  
164 heterochronic modulation of meristem determinacy that results from *cis*-regulatory differences  
165 impacts ear and tassel morphology, and is a likely driver of inflorescence diversity throughout  
166 the grasses.

167

## 168 **RESULTS AND DISCUSSION**

### 169 **Inflorescence architectures and *RAI* alleles in PACMAD and Panicoid grasses**

170 Mature maize inflorescences are spatially and morphologically distinct and produce dimorphic,  
171 unisexual florets: a terminal tassel bearing staminate florets and a lateral ear with pistillate florets  
172 (**Fig. 1A, B**). Mutations in the *ZmRAI* gene, typified by the strong *ra1-R* allele (Vollbrecht et al.,  
173 2005), result in multiple orders of branching in the tassel and the ear (**Fig. 1C, D**) that resemble  
174 complexly branched inflorescences of other grasses, such as terminal panicles of sorghum (**Fig.**  
175 **1E**) and setaria (**Fig. 1F**) which have unimorphic, bisexual florets. The conspicuous diversity of  
176 mature inflorescence morphologies in maize, sorghum and setaria, largely attributed to variation  
177 in degree of branching, manifests early in development (**Fig. S1**). Maize, sorghum and setaria  
178 belong to the subfamily Panicoideae, and within this large clade of grasses, maize and sorghum  
179 are members of tribe Andropogoneae, whereas setaria is a member of tribe Paniceae (ref.  
180 Kellogg, 2015). Maize and sorghum inflorescences produce a multitude of spikelets in pairs as is  
181 characteristic of related species in the Andropogoneae, whereas the setaria inflorescence is dense  
182 with single spikelets that each develop in close association with a bristle (Doust and Kellogg,  
183 2002; Kellogg, 2015).

184 Comparative genomic data indicate the *RAI* locus is specific to the PACMAD clade,  
185 whose largest subfamilies are the Panicoideae and Chloridoideae, where the intronless structure  
186 and unique QQLGGH motif within the C<sub>2</sub>H<sub>2</sub> zinc finger present in maize (Vollbrecht et al.,  
187 2005) appear conserved. For example, a syntenic copy of *RAI* is absent from the genomes of  
188 BOP clade members rice (*Oryza sativa*), *Brachypodium distachyon* and wheat (*Triticum*  
189 *aestivum*) (**Fig. S2A**) (Vollbrecht et al., 2005; Sigmon, 2010), but is present in the genome  
190 assemblies of Chloridoideae species teff (*Eragrostis tef*) and *Oropetium thomaeum* (Schnable,  
191 2019), and of finger millet (*Eleusine coracana*). Within the Panicoideae *RAI* resides as a single  
192 copy gene in maize and setaria and as a single-locus tandem duplication in sorghum (*SbRAI*<sup>TAN</sup>  
193 comprised of *SbRAI* upstream [*SbRAI*<sup>US</sup>] and *SbRAI* downstream [*SbRAI*<sup>DS</sup>] copies); however, a  
194 frameshift mutation in *SbRAI*<sup>US</sup> introduces a stop codon after the C<sub>2</sub>H<sub>2</sub> zinc finger domain,  
195 rendering it presumably nonfunctional (**Fig. 1G**) (Vollbrecht et al., 2005; Sigmon, 2010).  
196 Previously published RT-PCR and transcript profiling data indicate that *SbRAI*<sup>US</sup> is not  
197 expressed in inflorescences of sorghum BTx623, while *SbRAI*<sup>DS</sup> is (Vollbrecht et al., 2005;  
198 Wang et al., 2018; Leiboff and Hake, 2019). Broad sampling of diverse cultivated and wild  
199 sorghums found that, in all cultivated accessions, 1) *SbRAI*<sup>US</sup> contains the same frameshift and  
200 that the *SbRAI*<sup>DS</sup> open reading frame (ORF) encodes a predicted full length *RAI* protein; 2) the

201 *SbRA1* tandem duplication likely originated relatively recently with the *Sorghum* genus and may  
202 not be present in other grass species (Sigmon, 2010). Two *RA1* loci are present in miscanthus  
203 (**Fig. 1H**), but these are segmental duplicates in this paleotetraploid species (Sigmon, 2010;  
204 Mitros et al., 2020). The encoded *SbRA1*<sup>DS</sup> protein of cultivated sorghums, hereafter referred to  
205 as *SbRA1*, is ~69% identical to the *ZmRA1* protein and ~56% identical to the *SvRA1* protein.  
206 *ZmRA1* and *SvRA1* proteins are ~65% identical. *ZmRA1*, *SbRA1* and *SvRA1* proteins share a  
207 highly conserved C<sub>2</sub>H<sub>2</sub> zinc-finger domain and a conserved C-terminal EAR motif (**Figs. 1G and**  
208 **S2B**). Biochemical experiments have demonstrated the C<sub>2</sub>H<sub>2</sub> zinc-finger domain binds DNA  
209 (Dathan et al., 2002), and the EAR motif acts as a potent transcriptional repressor (Hiratsu et al.,  
210 2004; Tiwari et al., 2004). The motifs and their positioning are highly conserved between  
211 *ZmRA1*, *SbRA1* and *SvRA1* proteins. The C<sub>2</sub>H<sub>2</sub> zinc-finger domain between *ZmRA1* and *SbRA1*  
212 differs by one conservative amino acid variant (I67V, position relative to *ZmRA1*) that is  
213 identical (V) between *SbRA1* and *SvRA1*. Relative to *ZmRA1* and *SbRA1*, the *SvRA1* zinc-  
214 finger domain differs at three positions, none of them among invariant core C<sub>2</sub>H<sub>2</sub> residues  
215 (Vollbrecht et al., 2005). The C-terminal EAR motif is conserved between *ZmRA1* and *SbRA1*  
216 and varies by one residue (Q169E) in *SvRA1*. A second EAR motif adjacent to the C<sub>2</sub>H<sub>2</sub> zinc-  
217 finger domain (Sigmon 2010, Gallavotti et al., 2010) is highly conserved between *ZmRA1* and  
218 *SbRA1* but absent from *SvRA1* (**Figs. 1G and S2B**). Physical interaction between *ZmRA1* and  
219 REL2 involves both EAR motifs (Gallavotti et al., 2010); however, functional sufficiency of the  
220 maize C-terminal EAR motif has not been demonstrated.

221 By mining two kilobases of the *RA1* promoter region from eight Panicoideae taxa across  
222 the Chasmanthieae, Paniceae, Paspaleae and Andropogoneae tribes, we identified several blocks  
223 of highly conserved, noncoding *cis* sequence restricted to the Andropogoneae, where spikelets  
224 are paired (**Figs. 1H and S3**). These conserved *cis* sequences located in the promoter region of  
225 *ZmRA1* and *SbRA1*<sup>DS</sup> (Sigmon, 2010), were absent from the ~0.7 kb promoter region included in  
226 our *SbRA1*<sup>US</sup> transgene construct and were largely absent or not well conserved outside the  
227 Andropogoneae, including in *SvRA1* (**Figs. 1H and S3A, S3B**). Within the four Andropogoneae  
228 tribe taxa, where there are six promoter regions due to gene duplications, the conserved non-  
229 coding *cis* sequences harbored 48 putative transcription factor binding sites present among at  
230 least five of six sequences queried (**Supplemental dataset**). In maize, some of the conserved *cis*  
231 sequence overlaps with accessible chromatin profiled from developing ears but not accessible in



232 leaves (**Fig. S3C**; Ricci et al., 2019). Indeed, coinciding with the region of accessible chromatin  
233 we found that DNA affinity purification (DAP) sequencing of maize AUXIN RESPONSE  
234 FACTOR (ARF) transcription factors identified binding peaks (**Fig. S3C**; Galli et al., 2018)  
235 centered on a putative ARF binding motif, providing a possible additional link between auxin  
236 signaling and response and branch development (Gallavotti et al., 2008; Eveland et al., 2014).  
237 Also within the region of accessible chromatin and within a conserved non-coding *cis* sequence  
238 we identified a putative LEAFY (LFY) transcription factor binding motif (Winter et al., 2011) in  
239 all six Andropogoneae sequences queried (**Figs. 1H, S3B, S3C and Supplemental dataset**).  
240 LFY is bifunctional as an activator and repressor in Arabidopsis (William et al., 2004; Winter et  
241 al., 2011). Within the Andropogoneae the protein-coding regions of the *LFY*-like genes are  
242 highly conserved suggesting purifying selection and constraint on amino acid sequence  
243 (Bomblies and Doebley, 2005). Interestingly, in maize, transcripts of the *LFY* homologs *Zea*  
244 *FLORICAULA/LEAFY1 (ZFL1)* and *ZFL2* (Bomblies et al., 2003) accumulate in SPMs in a  
245 pattern that would likely border *ZmRAI* transcript accumulation (Vollbrecht et al., 2005). Tassel  
246 branch number is decreased in *zfl1; zfl2* double mutants, and positively correlates with *ZFL2*  
247 copy number (Bomblies et al., 2003; Bomblies and Doebley, 2006). These *ZFL* data are  
248 consistent with negative regulation of *ZmRAI* activity by *ZFL* gene activity, making it tempting  
249 to speculate that *ZFL* could repress *ZmRAI* where their expression domains abut in boundary  
250 cells at the margin of SPMs.

251

### 252 ***RAI* marks boundary domains adjacent to meristems in sorghum and setaria panicles**

253 To determine the accumulation of *RAI* transcripts in sorghum and setaria inflorescences, we  
254 performed RNA *in situ* hybridization with an antisense probe for *ZmRAI*, along with the  
255 meristem marker gene *KNOTTED1 (KNI)* (Jackson et al., 1994). In sorghum, *RAI* transcripts  
256 accumulated in a boundary domain directly adjacent to the SPM, as marked by accumulation of  
257 *KNI* transcripts (**Figs. 2A, B and S4A, B**). *RAI* transcripts were not detected in early-staged  
258 setaria inflorescences initiating branch meristems, as shown by accumulation of *KNI* (**Fig. 2C,**  
259 **D**), consistent with transcriptomic profiling of setaria inflorescence development (Zhu et al.,  
260 2018). In later-staged setaria inflorescences marked by SMs and bristles, we detected *RAI*  
261 transcripts in accordance with transcriptomic data (Zhu et al., 2018), which showed boundary  
262 domain accumulation adjacent to the SM (**Figs. 2E, F and S4C-F**). We consistently did not

263 detect *RAI* transcript accumulation in or adjacent to bristles, further distinguishing them from the  
264 spikelets they are paired with. In maize, *RAI* transcripts accumulate between recently-initiated  
265 SPMs and the inflorescence or branch axis (Vollbrecht et al., 2005). These results demonstrate 1)  
266 a conserved spatial pattern of *RAI* transcript accumulation that marks boundary domains  
267 adjacent to spikelet-associated short branch meristems in sorghum, setaria and maize  
268 inflorescences, whether SMs (setaria) or SPMs (maize and sorghum), 2) a conserved lack of  
269 expression associated with BMs and LBs and other branch types (i.e. the bristle in setaria) and 3)  
270 distinct temporal patterns consistent with discrete branching ontogenies.

271

### 272 **Expression of a *ZmRAI* transgene largely recovers normal inflorescence architectures in** 273 ***ral-R* mutants**

274 To study the function of promoter *cis* and coding sequence diversity of *RAI* loci in shaping the  
275 inflorescences of maize, sorghum and setaria, we generated a suite of transgenic experiments  
276 using interspecies gene transfer (Nikolov and Tsiantis, 2015). Maize, sorghum and setaria *RAI*  
277 genes and one chimeric maize-setaria *RAI* gene were introduced into maize and backcrossed into  
278 the B73 inbred genetic background containing the *ral-R* mutant allele. During backcrosses the  
279 events were scored for evidence of a heritable, single-locus, herbicide resistance phenotype as an  
280 indicator of stable expression of the 35S::BAR component of the transgene cassette. In total 17  
281 independent transgenic events satisfied these genetic segregation criteria (**Table S2**) and these  
282 were also scored qualitatively for their capacity to complement the *ral-R* mutant phenotype;  
283 from among them, we selected nine events for detailed analysis (**Table S1 and Methods**).

284 To examine maize *RAI* gene function, we first asked if normal tassel and ear  
285 morphologies could be recovered in severe *ral-R* mutants expressing a reintroduced *ZmRAI*  
286 genomic fragment containing 2.95 kb of the promoter region including the conserved *cis*  
287 sequences as well as 2.35 kb of sequence downstream of the CDS. We refer to this transgenic  
288 cassette as ‘198’ (**Fig. 3A; Table S1**). Five independent, stable, single-locus transgene events  
289 were generated for 198. Four of them showed similar effects on the *ral-R* phenotype and  
290 minimal pleiotropy while the fifth was markedly pleiotropic (**Supplemental Table 1**), conferring  
291 a dwarfed plant stature and severely reduced tassels and ears. We studied the effects of 198 in a  
292 single, non-pleiotropic insertion event (**Table S2**). Gross tassel and ear morphology of *ral-R*  
293 mutants expressing 198 appeared normal relative to non-transgenic *ral-R* siblings (**cf. Figs. 3B-**

294 **E to 1A**). Notably, *ral-R* ears expressing *I98* were fully unbranched, and kernels were in  
295 straight parallel rows along the ear axis; in contrast, kernel rowing was crooked in highly  
296 ramified *ral-R* ears (**Fig. 3D, E**) (Vollbrecht et al., 2005).

297 We quantified degree of branching, including branch type, lengths and spikelet pair  
298 density (**Fig. S5**) among inflorescences of segregating normal, *ral-R* mutants expressing *I98* and  
299 non-transgenic *ral-R* siblings to evaluate the degree of normal phenotype recovery. Along the  
300 primary axis of the tassel, normal maize produces LBs at the base with an immediate shift to  
301 short branches of SPs on the central spike (**Fig. 1A**). *ral-R* mutants produce LBs at the tassel  
302 base, then a variable number of transformed, mixed-fate branches bearing both SPs and single  
303 spikelets, followed by transformed branches (“spikelet multimers”) with multiple, single  
304 spikelets and finally an abbreviated central spike predominantly of short branches of SPs (**Fig.**  
305 **3B**) (Vollbrecht et al., 2005). The length of the central spike (CS) between normal and *ral-R*  
306 expressing *I98* were nearly equivalent (mean difference +0.95 cm); CS was significantly longer  
307 in *ral-R* with the transgene compared to non-transgenic *ral-R* siblings (mean difference -17.68  
308 cm) (**Fig. 3F**). The length of the long branch zone (LBZ) was slightly shorter in *ral-R* expressing  
309 *I98* relative to normal (mean difference -1.68 cm), whereas LBZ was significantly shorter in  
310 transgene positive *ral-R* compared to non-transgenic *ral-R* siblings (mean difference -11.84 cm)  
311 (**Fig. 3G**). Normal tassels produced on average 4.9 more LBs compared with *ral-R* tassels  
312 expressing *I98*, whereas non-transgenic *ral-R* siblings produced on average 17.4 more LBs than  
313 *ral-R* expressing *I98* (**Fig. 3H**). We observed a negligible difference in spikelet multimers  
314 (referred to as ‘multimers’ throughout) between normal and *ral-R* transgene-expressing tassels,  
315 but non-transgenic *ral-R* siblings produced on average 14 more multimers than *ral-R* expressing  
316 *I98* (**Fig. 3I**). Spikelet pair density (SPD) taken from a circumference of 1 cm at the CS  
317 midpoint was lower in *ral-R* transgene positive plants compared with both normal and non-  
318 transgenic *ral-R* siblings (-3.2 and -2.67 SPs, respectively) (**Fig. S6B**). The three most-basal  
319 tassel LBs were longer in *ral-R* expressing *I98* compared with both normal and non-transgenic  
320 *ral-R* siblings (**Fig. S6C**). Collectively, these results indicate that the *ZmRAI* transgene is  
321 sufficient to recover normal inflorescence architectures in the *ral-R* mutant background.

322

323 **Interspecies expression of a tandem duplicated *SbRAI* modeled transgene produces novel**  
324 ***ral-R* inflorescence architectures**

325 We next asked if interspecies expression of the canonical tandem duplicated *SbRAI* locus  
326 could recover normal tassel and ear morphologies in *ral-R* mutants. We modeled the tandem  
327 duplicated *SbRAI* transgenic cassette *SbRAI<sup>TAN</sup>* as a 6 kb genomic DNA fragment that includes  
328 ~0.7 kb promoter region of *SbRAI<sup>US</sup>*, the *SbRAI<sup>US</sup>* paralogous coding region followed by the  
329 contiguous 2.03 kb (including the conserved *cis* sequences) between the *SbRAI<sup>US</sup>* paralogous  
330 stop codon and the beginning of the *SbRAI<sup>DS</sup>* predicted ORF, the predicted ORF and 2.17 kb  
331 downstream of the *SbRAI<sup>DS</sup>* stop codon. We refer to this construct as ‘*I95*’ (**Fig. 4A; Table S1**).  
332 Three independent, stable, single-locus transgene events were generated for *I95* and backcrossed  
333 into the B73 background; we studied its effects on the *ral-R* mutant in all three (**Table S2**).

334 Overall, tassels of *ral-R* mutants that expressed *I95* were much less branched and ranged  
335 from normal (events 195.8.3 and 195.20.4) to compact (event 195.46.1) relative to highly  
336 branched non-transgenic *ral-R* siblings (**Fig. 4B-E**). Similarly, *I95*-expressing *ral-R* ears  
337 displayed a range in gross phenotype (**Fig. 4F-I, N**), but were overall much less branched than  
338 *ral-R* sibling ears. For event 195.8.3, ear branching was reminiscent of weak *ral* mutant alleles  
339 (**Fig. 4G**) (Vollbrecht et al., 2005; Gallavotti et al., 2010). Ears from event 195.20.4 and  
340 195.46.1 were occasionally fasciated and branched, and frequently had crooked kernel rows (**Fig.**  
341 **4H, I, N**). Ears from event 195.46.1 were consistently short and compact (**Fig. 4I**).

342 To understand the impact of *I95* on *ral-R* inflorescences, we quantified branch  
343 phenotypes for the three events. When compared to non-transgenic *ral-R* siblings, mean CS  
344 lengths were significantly longer (range of differences from +5.61 to +12.15 cm) and mean LBZ  
345 lengths were significantly shorter in *ral-R* carrying the *I95* transgene (range of differences from  
346 -12.13 to -18.36 cm) (**Fig. 4J, K**). Non-transgenic *ral-R* siblings produced on average 29.11 LBs  
347 and 18 multimers, which was significantly more compared to the mean range of 5.17 to 10.73  
348 LBs and 2.33 to 7.09 multimers in *I95* expressing *ral-R* siblings (**Fig. 4L, M**). SPD had a mean  
349 range of differences from -0.25 to +5.5 SPs between *ral-R* expressing the *I95* transgene and  
350 non-transgenic *ral-R* siblings (**Fig. S7B**). The three most basal LBs were significantly shorter in  
351 *ral-R* tassels that expressed the *I95* transgene compared with non-transgenic *ral-R* siblings  
352 (**Fig. S7C**).

353 Long branches are completely suppressed in normal ears (**Fig. 1B**); LBs are de-repressed  
354 by mutations in *ZmRAI* (**Fig. 1D**) (Vollbrecht et al., 2005). Ears of strong *ral* mutant alleles,  
355 such as *ral-RSd*, produce over 200 branches (Weeks, 2013). *ral-R* ears expressing the *I95*

356 transgene were significantly less branched compared to highly branched ears of non-transgenic  
357 *ral-R* siblings (**Fig. 4N**). Event 195.8.3 had a mean ear branch number of 9.3, similar to  
358 previously reported mean ear branch totals for weak alleles, *ral-63.3359* (11.2 branches) or *ral-*  
359 *RS* (12.1 branches) (Weeks, 2013). Events 195.20.4 and 195.46.1 had a mean of <1 branch (**Fig.**  
360 **4N**). Transcripts of the *I95* transgene accumulated in developing tassels beyond the stages when  
361 the endogenous *ZmRA1* transcript accumulation are highest (**Fig. S8A**), supporting heterochronic  
362 expression of the transgene in the tassel.

363         Taken together, expression of the *I95* transgene reduced the order of branching in *ral-R*  
364 mutant inflorescences, but curiously also produced novel *ral-R* phenotypes that included  
365 compact tassels and ears, and ear fasciation (**Fig. 4D, E, H, I**). Pleiotropic fasciation and  
366 stubbiness in the main axis suggest effects on the main inflorescence meristem, where *ral*  
367 expression was not detected in normal maize or sorghum. Strong, likely null, maize *ral* alleles  
368 have genetic lesions in the C<sub>2</sub>H<sub>2</sub> zinc finger domain (Vollbrecht et al., 2005), a putative DNA  
369 binding domain (Dathan et al., 2002). Indeed, *ZmRA1* is suggested to bind and modulate the  
370 expression of hundreds of genes during tassel and ear development, which includes the putative  
371 direct targeting and repression of *COMPACT PLANT2* (*CT2*; Bommert et al., 2013; Eveland et  
372 al., 2014). Loss-of-function *ct2* mutants have compact inflorescences and fasciated ears  
373 (Bommert et al., 2013), similar to what was observed to be conditioned by the *I95* transgene  
374 (**Fig. 4B-I**). To explain the novel *ral-R* phenotypes, we hypothesize that the *I95* transgene may  
375 function ectopically and affect expression of target genes like *CT2* outside of the spatio-  
376 temporally normal expression domain for *RA1*. Misregulation of *RA1* could occur if the  
377 upstream copy competes with the downstream copy for binding of regulatory factors, or if the  
378 gene duplication itself alters regulation, for example, by changing the distance between *cis*-  
379 regulatory elements or by creating novel ones. Another potential mechanism for the novel  
380 phenotypes could be at the level of the gene product. For example, given that the truncated  
381 upstream *RA1* copy encodes a C<sub>2</sub>H<sub>2</sub> zinc finger domain (**Figs. 1G and 4A**), expression from both  
382 copies could lead to binding interference between *SbRA*<sup>US</sup> (truncated) and *SbRA*<sup>DS</sup> (complete)  
383 proteins, where *SbRA*<sup>DS</sup> is required at sufficient levels to impose meristem determinacy. Similar  
384 interference mechanisms for dominant negative alleles have been reported to influence flowering  
385 in *Arabidopsis* (Ahn et al., 2006) and sunflower (Blackman et al., 2010). Although *SbRA*<sup>US</sup>

386 expression is barely detectable in sorghum inflorescences (Vollbrecht et al., 2005), we did not  
387 assay its expression in the transgenic lines.

388

### 389 **Interspecies expression of the downstream *SbRAI* modeled transgene partially recovers** 390 **normal inflorescence architectures in *ral-R* mutants**

391 Because *I95* conditioned novel phenotypic changes in addition to complementation, we asked if  
392 normal tassel and ear morphologies in *ral-R* mutants could be recovered by interspecies  
393 expression of only the downstream *SbRAI* locus, which does not contain frameshifts or apparent  
394 deleterious mutations. The downstream *SbRAI* transgenic cassette *SbRAI<sup>DS</sup>* was modeled to  
395 include its predicted ORF and 1.68 kb upstream including the conserved *cis* sequences plus 2.17  
396 kb downstream of the stop codon, and we refer to this construct as ‘*I96*’ (**Fig. 5A; Table S1**).  
397 Three independent, stable, single-locus transgene events were generated for *I96* and backcrossed  
398 to the *ral-R* mutant in B73, and we studied its effects in all three (**Table S2**).

399 Overall, tassels from *ral-R* mutants that expressed *I96* were less branched and ranged  
400 from normal (events 196.19.2 and 196.7.3) to moderately compact (event 196.14.5) architectures  
401 relative to highly ramified architecture of non-transgenic *ral-R* siblings (**Fig. 5B-E**). Similarly,  
402 *ral-R* ears expressing the *I96* transgene displayed a range in gross phenotype (**Fig. 5F-I, N**).  
403 Events 196.19.2 and 196.7.3 produced unbranched ears with straight rows of kernels along the  
404 ear axis (**Fig. 5G, H**), whereas event 196.14.5 showed ear branching reminiscent of weak *ral*  
405 mutant alleles (**Fig. 5I**) (Vollbrecht et al., 2005; Gallavotti et al., 2010).

406 To characterize the impact of *I96* on *ral-R* inflorescences in detail, we quantified tassel  
407 branch phenotypes for the three events. When compared to non-transgenic *ral-R* siblings, mean  
408 CS lengths were significantly longer (range of differences from +2.75 to +8.95 cm) and mean  
409 LBZ lengths were significantly shorter in *ral-R* that carried the *I96* transgene (range of  
410 differences from -12.71 to -14.15 cm) (**Fig. 5J, K**). Non-transgenic *ral-R* siblings produced on  
411 average 26.8 LBs and 17 multimers, which was significantly more compared to the mean range  
412 of 4.58 to 8 LBs and 2.83 to 4.2 multimers in *ral-R* expressing the *I96* transgene (**Fig. 5L, M**).  
413 SPD had a mean range of differences from +1.53 to +7.33 SPs between *ral-R* with the *I96*  
414 transgene and transgene-free *ral-R* siblings (**Fig. S9B**). The three most basal LBs were  
415 significantly shorter in *ral-R* tassels with the *I96* transgene compared with non-transgenic *ral-R*  
416 siblings (**Fig. S9C**). Interspecies expression of *I96* was sufficient to impose SPM determinacy in

417 *ral-R* ears for events 196.19.2 and 196.7.3, where branch suppression was fully penetrant. Event  
418 196.14.5 had on average 2 branches (**Fig. 5N**), which was significantly less than average ear  
419 branch number for weak *ral* alleles (Weeks, 2013). Transcripts of the *I96* transgene  
420 accumulated in developing tassels beyond the stages when the endogenous *ZmRAI* transcript  
421 accumulation are highest (**Fig. S8B**), supporting heterochronic expression of the transgene in the  
422 tassel.

423 Collectively, interspecies expression of *I96* restored more normal ear inflorescences with  
424 less branching and straighter rows, and less pleiotropy with respect to fasciation and shortened  
425 axes, relative to the *I95* cassette. Furthermore, both the *I95* and *I96* constructs substantially  
426 remediated *ral-R* tassel branching. Given that the *I96* transgene eliminates the *SbRAI<sup>US</sup>* locus  
427 present in the *I95* construct, these results suggest functional *cis*-regulatory element(s) that reside  
428 in the 1.68 kb sequence promoter region of the *SbRAI<sup>DS</sup>* locus are affected by their proximity to  
429 *SbRAI<sup>US</sup>* in the tandem duplication, especially in the maize ear. Our data on *ral-R* mutants  
430 expressing either *I95* or *I96* cassettes are consistent with a hypothesis raised previously  
431 (Vollbrecht et al., 2005): variation in inflorescence architecture, and thus degrees of determinacy,  
432 is attributed to the developmental timing of *RAI* expression and its activity, as reflected in the  
433 range of branch types observed among maize mutant alleles, transgene versions, or genetic  
434 diversity of *RAI* in maize and other grasses. Furthermore, these results suggest that  
435 developmental context of *RAI* activity in the tassel and ear is crucial in regulating determinacy  
436 (cf., ear and tassel phenotypes in **Figs. 4 and 5**). Indeed, quantification of ear and tassel branch  
437 number in the F<sub>1</sub> hybrid generation of B73 x Mo17 introgressions homozygous for the weak  
438 allele *ral-63.3359* showed additive effects on ear branching and over-dominance effects on  
439 tassel branching (Weeks, 2013).

440

441 **Interspecies expression of *SvRAI* only recovers near normal inflorescence branching in**  
442 ***ral-R* mutants when chimeric with the *ZmRAI* promoter region**

443 Given the complex genetic nature of the *SbRAI* locus, we sought to explore the impact of the  
444 single copy *SvRAI* on inflorescence morphology. We were also interested in testing the impact  
445 of the *cis* sequences found in promoter regions of *ZmRAI* and *SbRAI<sup>DS</sup>* and conserved among  
446 Andropogoneae grasses, as well as sufficiency of the single EAR motif in *SvRAI*. We therefore  
447 compared and contrasted interspecies expression of the *SvRAI* coding region with its endogenous

448 promoter region that largely lacks the conserved *cis* sequences with expression of the *SvRAI*  
449 gene body in *cis* with the maize promoter region (*pZmRAI*). We modeled the *SvRAI* transgene  
450 cassette to include 1.53 kb of the predicted *SvRAI* promoter region, the coding region and 1.97  
451 kb downstream of the stop codon and we refer to it as ‘162’ hereafter (**Fig. 6A; Table S1**).  
452 Additionally, we generated a chimeric gene cassette termed *pZmRAI::SvRAI* where 2.95 kb of  
453 *ZmRAI* promoter region and five-prime untranslated region was fused upstream of the *SvRAI*  
454 coding sequence and 1.97 kb of downstream *SvRAI* sequence and we refer to the construct as  
455 ‘175’ hereafter (**Fig. 6B; Table S1**). Four independent, stably herbicide-resistant and single-  
456 locus transgene events were identified for 162 during backcrossing to the B73 tester line (**Table**  
457 **S2**). Of those events, three were unique among all stable, herbicide-resistant transgenics we  
458 propagated in this study, across all five constructs, in that they showed no notable effect on the  
459 strong *ral-R* mutant phenotype or any other plant phenotypes examined. Thus, quantitative  
460 phenotyping was not performed for these three events, which strongly suggests the *SvRAI*  
461 transgene has little or no functional activity in maize. The fourth event for 162 showed some  
462 reduction of vegetative shoot stature and effects on inflorescence branching and was therefore  
463 examined for ear and tassel phenotype, although we consider it an outlier or novel event among  
464 the four 162 transgenic lines. One stable, single-locus transgene event was generated for 175  
465 and backcrossed to B73 and it affected inflorescences but was non-pleiotropic for vegetative  
466 plant characteristics. Thus, we studied the effects of 162 and 175 in single-locus events  
467 backcrossed in the *ral-R* mutant background (**Table S2**).

468 Overall, tassels from *ral-R* mutants that expressed the novel 162 event or expressed the  
469 175 transgene were less branched and had normal architectures relative to the highly branched  
470 architecture of non-transgenic *ral-R* siblings (**Fig. 6C-E**). Similarly, *ral-R* ears expressing 162  
471 displayed a range in gross phenotype from unbranched ears with straight rows of kernels along  
472 the ear axis and no branches to those with crooked rows and a low degree of branching (**Fig. 6F,**  
473 **G, M**). In contrast, *ral-R* ears expressing 175 were fully unbranched with kernels in straight  
474 parallel rows along the ear axis (**Fig. 6H, M**).

475 To understand the impact of the novel 162 event or of 175 on *ral-R* tassels and ears, we  
476 quantified branch phenotypes. When compared to non-transgenic *ral-R* siblings, mean CS  
477 lengths were significantly longer (difference +13.67 cm for both 162 and 175) and mean LBZ  
478 lengths were significantly shorter in *ral-R* tassels expressing either 162 or 175 transgenes



479 (difference -11 cm for *I62* and -12.1 cm for *I75*) (**Fig. 6I, J**). Relative to normal tassels, mean  
480 CS lengths were shorter (difference -5.0 cm for both *I62* and *I75*) and mean LBZ lengths were  
481 marginally longer in *ral-R* tassels with either *I62* or *I75* (difference +1.27 cm for *I62* and +0.17  
482 cm for *I75*) (**cf. Figs. 3F, G to 6I, J**). Non-transgenic *ral-R* sibling tassels produced on average  
483 35.1 LBs and 25.1 multimers, which were significantly more compared to averages of 12.7 LBs  
484 and 3.1 multimers for *I62*, and 7.5 LBs and 1.7 multimers for *I75* expressing *ral-R* siblings  
485 (**Fig. 6K, L**). Compared to a mean of 9.6 LBs and 2 multimers for normal tassels, *I62* expressing  
486 *ral-R* tassels produced on average 3.1 more LBs and 0.9 more multimers, whereas *I75*  
487 expressing *ral-R* tassels had 2.1 fewer LBs and 0.3 fewer multimers (**cf. Figs. 3H, I to 6K, L**).  
488 For SPD, *ral-R* tassels with *I62* had on average 3.2 more SPs along the CS compared to non-  
489 transgenic *ral-R* siblings, and similarly, *ral-R* tassels with *I75* had 2.2 more SPs (**Fig. S10B**).  
490 Relative to SPD for normal tassels, *ral-R* expressing *I62* had on average 0.7 fewer SPs and *ral-*  
491 *R* expressing *I75* had 1.7 fewer SPs along the CS (**cf. Figs. S6B to S10B**). The three most basal  
492 LBs were consistently shorter in *ral-R* tassels that carried the *I62* transgene compared with non-  
493 transgenic *ral-R* siblings; LBs were of similar length between *ral-R* expressing the *I75*  
494 transgene and non-transgenic *ral-R* siblings (**Fig. S10C**). Compared to normal tassels, the three  
495 most basal LBs of *ral-R* tassels expressing either *I62* or *I75* were shorter (**cf. Figs. S6C to**  
496 **S10C**).

497 Establishment of SPM determinacy during ear development differed conspicuously  
498 between *ral-R* expressing the *I75* transgene and expressing the novel *I62* event. *ral-R* with the  
499 *I62* transgene produced an average of 4 branches, whereas *ral-R* ears carrying the *I75* transgene  
500 were unbranched (**Fig. 6M**). Overall, the *I75* transgene behaved most similarly to the *I98*  
501 endogenous maize construct.

502 Collectively, the transgene constructs containing *SvRAI* conferred degrees of  
503 complementation from non- to partial to nearly complete, all without inducing the novel  
504 inflorescence phenotypes of sorghum transgenes. Whereas in most *SvRAI* (*I62*) lines the intact  
505 *SvRAI* gene did not complement the *ral-R* mutant phenotype, we saw some effects in one line.  
506 Similarly, the *ZmRal* and *SbRal* events were not all identical in their phenotypic effects, as is  
507 not unusual among transgene events integrated into different chromosomal regions. We speculate  
508 that the novel *SvRAI* (*I62*) event may be integrated in a genomic context that results in  
509 effectively ectopic expression, and therefore suggesting a lack of appropriate *cis* regulatory

510 components in the *SvRA1* promoter region while revealing some functional potential of the  
511 *SvRA1* gene product.

512 In the encoded polypeptides, *ZmRA1* and *SvRA1* C<sub>2</sub>H<sub>2</sub> zinc-finger domains vary by three  
513 amino acid residues, and the C-terminal EAR motif in *SvRA1* differs by one residue. However, a  
514 conserved EAR motif adjacent to the C<sub>2</sub>H<sub>2</sub> zinc-finger domain in *ZmRA1* is absent in *SvRA1*  
515 (**Figs. 1G and S2B**). In maize, RA1 physically interacts with REL2 via EAR motifs in a large  
516 transcriptional repressor complex to impose SPM determinacy (Gallavotti et al., 2010; Liu et al.,  
517 2019). Functional importance of the EAR motif adjacent to the C<sub>2</sub>H<sub>2</sub> zinc-finger domain has not  
518 been tested genetically. Our data from the *I75* chimeric gene cassette suggest the C<sub>2</sub>H<sub>2</sub> -proximal  
519 EAR motif, which is by definition dispensable for RA1 function in setaria, is likewise to a  
520 significant degree nonessential in maize. Whereas complementation was only partial for novel  
521 *I62* event, it was more complete for the chimeric *I75* construct. The promoter region swap data  
522 clearly indicate that *cis*-encoded regulation of *RA1* expression is a key functional component in  
523 promoting SPM determinacy, especially during ear development. In an evolutionary context it is  
524 interesting to note that while spikelets are normally unpaired in setaria and the *SvRA1* gene is  
525 insufficient to complement the maize *ral-R* mutant with its many unpaired spikelets, under the  
526 proper expression conditions the *SvRA1* gene product does confer sufficient determinacy  
527 activity to restore SPs to *ral-R* maize. These results suggest that within the Panicoideae  
528 subfamily of the PACMAD grasses *RA1* has an evolutionarily conserved determinacy function  
529 that contributes to specifying short branch meristems: SMs in setaria and SPMs in maize and  
530 sorghum. Our data are all consistent with a hypothesis wherein within the paired-spikelet  
531 Andropogoneae tribe, *RA1* has been adopted a key role in producing the SP by imposing  
532 determinacy in the proper developmental context rather than by specifying any strict SPM  
533 identity. It would be interesting to test whether the *RA1* genes from other Panicoid species as  
534 well as from Chloridoideae subfamily and/or other PACMAD grasses show similar functions.

535 The developmental context in which genes and networks operate within meristems and  
536 flanking organ boundary domains is critical in determining inflorescence form. Elegant genetic  
537 studies on the spatiotemporal regulation and function of transcription factors have shed important  
538 light on the mechanisms governing inflorescence branching patterns. Genetic variation in distal  
539 regulatory elements (Clark et al., 2006; Studer et al., 2011), proximal or intronic *cis* regulatory  
540 elements (Arnaud et al., 2011; Wills et al., 2013; Kusters et al., 2015), coding sequences that

541 alter protein function (Wang et al., 2005; Whipple et al., 2010), protein-protein interactions  
542 (Bartlett et al., 2016; Abraham-Juarez et al., 2020) or protein-DNA interactions (Maizel et al.,  
543 2005; Sayou et al., 2014) are critical drivers of inflorescence branching. Our data leveraging  
544 interspecies gene transfer and chimeric transgene expression suggest that *cis*-encoded regulation  
545 of *RAI* expression is a key factor in modulating meristem determinacy that ultimately impacts  
546 grass inflorescence architecture. With the ability to map hundreds of regulatory regions and  
547 transcription factor binding sites across diverse plant genomes (Lu et al., 2019; Galli et al.,  
548 2020), it will be important to understand the regulatory context of the conserved *cis* sequences  
549 that reside in *RAI* promoters.

550 Branch determinacy in the grasses is controlled by gene networks that function in  
551 boundary domains adjacent to the meristem they positionally regulate. Since their discovery,  
552 such ‘signaling centers’ have emerged as a major theme in regulating meristem determinacy, not  
553 meristem identity, and are key drivers of complex branching patterns seen in grass inflorescences  
554 (Whipple, 2017). Maize *RAMOSA* genes—*RAI* (Vollbrecht et al., 2005), *RA2* that encodes a  
555 LATERAL ORGAN BOUNDARY domain transcription factor (Bortiri et al., 2006) and the  
556 TREHALOSE PHOSPHATE PHOSPHATASE-encoding *RA3* (Satoh-Nagasawa et al., 2006)—  
557 constitute a ‘signaling center’ as these genes are co-expressed in overlapping boundary domains  
558 (Vollbrecht and Schmidt, 2009) and likely regulate a mobile signal that promotes determinacy of  
559 adjacent BMs. Similarly, BM determinacy is controlled by the GATA domain zinc-finger and  
560 SQUAMOSA PROMOTER BINDING PROTEIN transcription factors encoded by *TASSEL*  
561 *SHEATH1* (*TSH1*) and *TSH4* (Whipple et al., 2010; Chuck et al., 2010), and SM identity and  
562 determinacy are regulated by boundary expression of *BRANCHED SILKLESS1* and  
563 *INDETERMINANT SPIKELET1* that encode APETALA2 domain transcription factors (Chuck et  
564 al., 1998; 2007). BMs, SPMs and SMs are not meristem types found in eudicot inflorescences,  
565 where variation and complexity are largely governed by shifts in meristem identity  
566 (Prusinkiewicz et al., 2007; Lemmon et al., 2016). Given that *RAI* transcripts accumulate in  
567 meristem boundary regions during development of sorghum and setaria inflorescences, it will be  
568 interesting to test the functional consequences of mutating *RAI* in these grasses. Meristem  
569 identity genes in eudicots are expressed in meristems; genes that regulate inflorescence variation  
570 and complexity in the grasses are expressed in adjacent boundary domains to regulate meristem  
571 determinacy. Our work on the expression and functional conservation of syntenic *RAI* orthologs

572 provides comparative insight into the genetic basis of grass inflorescence diversity, and opens the  
573 door for future reverse engineering of grass inflorescence evolution for crop improvement.

## 574 MATERIALS AND METHODS

### 575 Genetic Stocks

576 This study utilized the *ral-R* allele (Vollbrecht et al., 2005) backcrossed seven generations to the  
577 B73 background to generate the “recurrent B73 parent;” either *ral-R* homozygotes or *ral-R/ral-*  
578 *B73* heterozygotes were used in crossing schemes.

579

### 580 Generation of *RAI* transgenes

581 The 35S<sub>BAR</sub> fragment from pTF101.1 was modified by PCR to introduce a *Hind*III site at the 3’  
582 end of the terminator. This allowed a 2.0 kb *Hind*III restriction fragment containing 35S<sub>BAR</sub>-  
583 terminator to be isolated, treated with DNA polymerase I (Klenow) and dNTPs to generate blunt  
584 ends, and ligated into the *Sma*I site of pSB11 (Komari et al., 2006), creating a vector called  
585 pSB11\_BAR. This vector, which contains the 35S<sub>BAR</sub> gene adjacent to and transcribed towards  
586 the T-DNA left border, was the precursor to all of the complementation vectors containing the  
587 genomic regions described below.

588 For construct *198*, *ZmRAI* and flanking regulatory regions were PCR amplified from *Z.*  
589 *mays* B73 genomic DNA and ligated with pSB11\_BAR at *Hind*III. To distinguish the *198\_RA1*  
590 allele from endogenous allele in subsequent generations after plant transformation, we  
591 introduced an *Acc*I restriction site in the *RAI* coding DNA sequence. This synonymous SNP  
592 (B73\_v5 7: 114959005 C>T) is a natural, low frequency variant found in the maize inbred P39  
593 haplotype (Vollbrecht et al., 2005). For the Sorghum construct *196*, a 6.0 kb *Xba*I fragment  
594 obtained by screening a BTx623-derived BAC library with a *ZmRAI* probe was cloned into  
595 pBluescript II KS (Agilent) and the *Hind*III site in the polylinker was used for ligation into  
596 pSB11\_BAR. Sorghum construct *195* was generated from *196* following introduction of a  
597 *Hind*III site at the 3’ end of the upstream *SbRAI* frameshift copy (2: 58699332; **Table S1**)  
598 thereby removing a 1.6 kb fragment containing the upstream copy. For the *Setaria viridis*  
599 construct *162*, in-fusion cloning methods (Clontech/Takara) were employed to PCR-amplify and  
600 clone from *S.viridis* A10 genomic DNA a 4 kb fragment containing the *SvRAI* transcribed region  
601 and regulatory sequences into pSB11-BAR as a *Hind*III-*Bam*HI insertion. The maize/setaria  
602 chimeric construct *175* was generated as a translational fusion at the start codon by replacing the  
603 *Setaria* promoter-containing fragment in *162* with the 2.9 kb maize fragment. The reference

604 genome coordinates of the *RAI* genes and regulatory regions are listed in **Table S1**, and all  
605 primers used for vector construction are listed in **Table S3**.

606 Constructs except for 175 were recombined into the pSB1 superbinary vector in  
607 *Agrobacterium tumefaciens* LBA4404 via triparental mating (Komari et al., 2006). These strains  
608 were used for Agrobacterium-mediated maize transformation of Hi-II embryos by the Iowa State  
609 University Plant Transformation Facility. Transgenic maize plants containing the 175 cassette  
610 were generated in Erik Vollbrecht's lab at Iowa State University using particle bombardment of  
611 immature Hi-II embryos with the SB11\_BAR-derived vector directly (Frame et al., 2000).

612

### 613 **Tests for recovery in *ral-R***

614 T0 transgenic plants were crossed three times (construct 198) or four times (constructs 195, 196,  
615 162 and 175) to the recurrent B73 parent line before phenotyping. During the introgression  
616 generations, plants were treated with a 2.5% Liberty solution applied to a single leaf to assay for  
617 35SBR gene-mediated resistance to Liberty herbicide (source, BASF). We also used transgene-  
618 specific genotype analyses to track integration events and determine transgene locus number by  
619 segregation analysis. DNA was made from leaf punches as previously described (Strable et al.,  
620 2017) and PCR-based genotype assays were performed using standard conditions with the  
621 primers described (**Table S3**). To genotype alleles at the endogenous *ZmRAI* locus in the  
622 presence of all but the 198 transgene, a CAPS assay was utilized to detect a SNP within with the  
623 *ral-R* allele which results in the introduction of an *AccI* restriction site. The 765 bp amplicon  
624 generated by primers RA8 and RA11 is digested by *AccI* in *ral-R* to generate two fragments,  
625 334 bp and 431 bp. The 198 transgene contains the same *AccI* SNP as *ral-R*. Thus, in crosses  
626 with the 198 transgene, an additional *MscI* dCAPS assay that detects the lesion in the *ral-R*  
627 mutant allele was employed to distinguish the 198-derived amplicons (i.e., without *MscI* site to  
628 yield 190 bp) from the *ral-R* derived amplicons (with the *MscI* site to yield 155 bp and 35 bp  
629 following digestion).

630 Transgene events that segregated as single locus integrations and showed a stable  
631 herbicide-resistance phenotype were selected for qualitative or quantitative phenotyping analysis.  
632 To produce the segregating populations used for phenotyping 198, 195 and 196, plants  
633 heterozygous *ral-R/+* and hemizygous for the transgene of interest were crossed as females by  
634 *ral-R/ral-R* pollen of the recurrent B73 parent. To produce the 162 and 175 material for

635 phenotyping we crossed females homozygous *ral-R/ral-R* and hemizygous for the transgene of  
636 interest by *ral-R/ral-R* pollen.

637

### 638 **Phenotypic analysis**

639 All maize plant phenotyping was performed on field-grown plants in the summers of 2014  
640 (constructs 195, 196 and 198) and 2018 (constructs 162 and 175), at the same location on the  
641 Woodruff Farm in Ames, Iowa. Tassel phenotype characters are summarized in **Fig. S5** and  
642 described here. Long branch zone was measured from the basal-most to the apical-most long  
643 branches. Central spike length was taken from the apical-most long branch to the tip of the tassel  
644 and comprised spikelet pairs. A long branch was defined as the typical basal long branches in  
645 maize, i.e. bearing only spikelet pairs, or as bearing a mix of spikelet pairs and single spikelets.  
646 Spikelet multimers were any branches bearing three or more single spikelets. Spikelet pair  
647 density was taken from a 1 cm band in circumference at the central spike midpoint.

648

### 649 **RNA *in situ* hybridization and expression analysis**

650 Field-grown *S. bicolor* and growth chamber-grown *S. viridis* panicles were fixed overnight at 4°  
651 C in FAA. Samples were dehydrated through a graded ethanol series (50%, 70, 85, 95, 100) each  
652 one hour, with three changes in 100% ethanol. Samples were then passed through a graded  
653 Histo-Clear (National Diagnostics) series (3:1, 1:1, 1:3 ethanol: Histo-Clear) with 3 changes in  
654 100% Histo-Clear; all changes were one hour each at room temperature. Samples were then  
655 embedded in Paraplast®Plus (McCormick Scientific), sectioned, and hybridized as described  
656 previously (Strable and Vollbrecht, 2019). Hybridizations were performed using antisense  
657 digoxigenin-labeled RNA probes to *ZmRAI* (**Table S3**) and *ZmKNI* (Jackson et al., 1994).

658 Field-grown, developmentally staged maize tassels were dissected away from leaf  
659 primordia and placed individually in 100 µL Trizol (Thermo-Fisher) and stored at -80°C in a 1.5  
660 mL Eppendorf tube until processing. To process, 400 µL Trizol was added and tassel tissue was  
661 thawed and ground in the presence of Trizol using a plastic drill mount pestle. Total RNA was  
662 extracted as per the Trizol manufacturer and treated with RQ1 DNase (Promega) following the  
663 protocol outlined by the manufacturer, and converted to cDNA using RNA to cDNA EcoDry™  
664 Premix (Double Primed) reagents (Takara Bio USA). The cDNA was diluted 1:1 with water,  
665 and 1.0 µL was used for PCR. PCR followed standard conditions using GoTaq®Green Master

666 Mix (Promega corp.), Ta= 58°C, 1 min. extension at 72°C for 33 cycles. Primers are listed in  
667 **Table S3.**

668

### 669 **Conservation analysis of promoter *cis* sequences**

670 For mVISTA analysis, genomic sequences (0.5 kb) upstream of the predicted 5'UTR regions of  
671 *RAI* in *Zea mays*, *Sorghum bicolor* and *Setaria viridis* were downloaded from  
672 <https://ensembl.gramene.org> and aligned using mVISTA LAGAN alignment  
673 (<https://genome.lbl.gov/vista/mvista/submit.shtml>). The plots depict 100 bp alignment windows  
674 at a similarity threshold 70% shaded in red.

675 To identify conserved non-coding sequences and binding motifs, the coding sequence of  
676 *Zea mays RAI* (Zm00001eb312340 – B73-REFERENCE-NAM-5.0) was used to find likely  
677 orthologs in other Panicoideae grasses. Sequences from *Chasmanthium laxum*  
678 (Chala.06G030500 – v1.1), *Miscanthus sinensis* (Misin03G169300 & MisinT268200 – v7.1),  
679 *Panicum halli* (Pahal.2G260300 – v3.2), *Paspalum vaginatum* (Pavag06G030400 – v.3.1),  
680 *Setaria viridis* (Sevir.2G209800 – v2.1) and *Sorghum bicolor* (Sobic.002G197700 and  
681 Sobic.002G197800 – v3.1.1) were identified using the BLAST tool in Phytozome v13. Sequence  
682 from *Coix lacryma-jobi* (Adlay0592-017T1) was selected from its own genome site.  
683 (<http://phyzen.iptime.org/adlay/index.php>). From all accessions, we took 2 kb upstream of the  
684 translation initiation site. First, conserved non-coding sequences from *RAI* promoter region  
685 sequence from Andropogoneae was determined using MEME (Bailey and Elkan, 1994). Then,  
686 the resulting motifs were searched in the other Panicoideae non-Andropogoneae grasses using  
687 FIMO (Grant et al., 2011). All sequences were compared against the non-redundant JASPAR  
688 CORE (2018) database from plants while using SEA to observe any possible well-known  
689 binding sites present internally (Bailey and Grant, 2021). The position of motifs from JASPAR  
690 were compared with the position of conserved non-coding sequences to check for overlap.  
691 Motifs from Clade 'A' ARFs were searched on the different sequences by using FIMO (Galli et  
692 al, 2018). Finally, these binding sites from the SEA analysis were used to search again in the  
693 Andropogoneae grasses using FIMO to obtain the relative coordinates in the *ZmRAI* promoter  
694 region (Grant et al., 2011).

695

### 696 **Accession numbers**



697 *ZmRAI*, Zm00001eb312340; *ZmKNI*, Zm00001eb055920; *SbRAI<sup>DS</sup>*, Sobic.002G197700;  
698 *SbRAI<sup>US</sup>*, Sobic.002G197800; *SvRAI*, Sevir.2G209800; *ClRAI*, Chala.06G030500; *MsRAI*,  
699 Misin03G169300 & MisinT268200; *PhRAI*, Pahal.2G260300; *PvRAI*, Pavag06G030400; *Cl-j*,  
700 Adlay0592-017T1, *Eleusine coracana RAI* ELECO.r07.6AG0534810.1

701

## 702 **ACKNOWLEDGEMENTS**

703 We are grateful to Brandi Sigmon for insightful discussion on *RAI* in sorghum and for comments  
704 on the manuscript. Additionally, we thank Pete Lelonek for assisting with greenhouse  
705 management and plant care. Many thanks to former undergraduate students, especially Emery  
706 Peyton, Charlie Beeler, Tryggve Rogers, Raven Saunders-Duckett, Matt Hirsch, Nicole Essner  
707 and Jack Schwickerath for their help with summer genetics nurseries and phenotypic analysis.  
708 We appreciate the insightful comments on the manuscript from Jack Satterlee. This work was  
709 supported by the National Science Foundation (IOS number 1238202 to E.V.). J.S. and A.A.R.  
710 are supported by North Carolina State University startup funds and USDA Hatch project  
711 1026392.

712

## 713 **AUTHOR CONTRIBUTIONS**

714 J.S., E.U.-W. and E.V. designed research; J.S., E.U.-W., S.B., and E.V. performed experiments;  
715 J.S., E.U.-W., A.A.R. and E.V. analyzed data; J.S., E.U.-W. and E.V. wrote the paper.

716 **FIGURE LEGENDS**

717

718 **Figure 1. Architecture of maize, maize *ral-R* mutant, sorghum and *S. viridis* inflorescences**

719 **and genomic relationship of *RAI*.** Normal inbred B73 maize tassel (A) and ear (B). Maize *ral-*  
720 *R* mutant tassel (C) and ear (D). (E) *S. bicolor* panicle. (F) *S. viridis* panicle. (A-F)

721 Inflorescences not to scale. (G) Annotated gene structure for *RAI* homologs. Tandem duplication  
722 of *SbRAI* locus is shown with indicated frameshift mutation (fs) in upstream copy of *SbRAI*.

723 Predicted promoter regions are indicated by color lines. Gray box, conserved non-coding *cis*  
724 sequences (see 1H). Open box, UTR sequences. Magenta box, encoded C<sub>2</sub>H<sub>2</sub> zinc finger domain.

725 Blue box, encoded EAR motif. (H) Conserved non-coding *cis* sequences in the *RAI* promoters of

726 Panicoid grasses. Among species in the tribe Andropogoneae, the promoter regions of *RAI*

727 display different motifs conserved in sequence and arrangement (correspondingly colored boxes

728 are conserved; Fig. S3C) compared to other tribes in the Panicoideae family. Upstream (US) and

729 downstream (DS) tandem duplicate *SbRAI* copies and duplicate *MsRAI* copies A and B are

730 indicated. Dashed lines underscore promoter regions incorporated into transgene cassettes. Some

731 conserved sequences contained binding motifs for well-known transcriptional regulators, such as

732 LEAFY and Clade A ARFs (Fig. S3B). Solid squares,  $P$ -values  $\leq 1^{-20}$ ; cross-hatched squares,  $P$ -

733 values  $\leq 1^{-05}$ ; arrowhead – LEAFY-binding motifs; asterisks – Clade A ARF-binding motifs.

734 Character state of spikelets (paired, single or with a bristle) is indicated on the phylogeny.

735

736 **Figure 2. RNA *in situ* hybridization in sorghum and *S. viridis* inflorescences.** Antisense RNA

737 probes to *ZmRAI* (A, C, E) or *ZmKN1* (B, D, F) were hybridized to longitudinal sections of

738 developing inflorescences from sorghum, *Sb* (A, B) or *S. viridis*, *Sv* (C-F). Arrowheads denote

739 *RAI* transcript accumulation in boundary domains. Scale bars, 100  $\mu$ m.

740

741 **Figure 3. Expression of the *ZmRAI* locus as a transgene in *ral-R* mutant background.** (A)

742 *l98* cassette for expression of *ZmRAI* containing 2.9 kb of upstream sequence including

743 conserved non-coding *cis* regions. (B) *ral-R* tassel. (C) *ral-R* tassel expressing 198.7.3. (D) *ral-*

744 *R* ear. (E) *ral-R* ear expressing 198.7.3. Scale bars, 2 cm. (F) Central spike length. (G) Branch

745 zone length. (H) Number of long branches. (I) Number of spikelet multimers. For all box and

746 whisker plots, the bottom and top boxes represent the first and third quartile, respectively, the

747 middle line is the median, and the whiskers represent the minimum and maximum values, outlier  
748 data points are displayed as individual dots. Two-tailed Student's *t* test for transgene vs. *ral-R*  
749 \*\*\* $P < 0.001$ ; normal,  $n = 20$ ; *ral-R*,  $n = 10$ ; 198.7.3,  $n = 8$ .

750

751 **Figure 4. Interspecies expression of the tandem duplicated *SbRAI* modeled transgene in the**

752 ***ral-R* mutant background.** (A) *I95* cassette for interspecies expression of the tandem  
753 duplicated *SbRAI* locus. (B) *ral-R* tassel. (C-E) *ral-R* tassels expressing 195.8.3 (C), 195.20.4  
754 (D) and 195.46.1 (E) transgenes. (F) *ral-R* ear. (G-I) *ral-R* ears expressing 195.8.3 (G),  
755 195.20.4 (H) and 195.46.1 (I) transgenes. Scale bars, 2 cm. (J) Central spike length. (K) Branch  
756 zone length. (L) Number of long branches. (M) Number of spikelet multimers. (N) Number of  
757 ear branches. For all box and whisker plots, the bottom and top boxes represent the first and third  
758 quartile, respectively, the middle line is the median, and the whiskers represent the minimum and  
759 maximum values, outlier data points are displayed as individual dots. Two-tailed Student's *t* test  
760 for transgene vs. *ral-R* \*\*\* $P < 0.001$ ; *ral-R*,  $n = 18$ ; 195.8.3,  $n = 11$ ; 195.20.4,  $n = 12$ ; 195.46.1,  
761  $n = 11$ .

762

763 **Figure 5. Interspecies expression of the downstream *SbRAI* modeled transgene in the *ral-R***

764 **mutant background.** (A) *I96* cassette for interspecies expression of the downstream *SbRAI*  
765 locus. (B) *ral-R* tassel. (C-E) *ral-R* tassels expressing 196.19.2 (C), 196.7.3 (D) and 196.14.5  
766 (E) transgenes. (F) *ral-R* ear. (G-I) *ral-R* ears expressing 196.19.2 (G), 196.7.3 (H) and  
767 196.14.5 (I) transgenes. Scale bars, 2 cm. (J) Central spike length. (K) Branch zone length. (L)  
768 Number of long branches. (M) Number of spikelet multimers. (N) Number of ear branches. For  
769 all box and whisker plots, the bottom and top boxes represent the first and third quartile,  
770 respectively, the middle line is the median, and the whiskers represent the minimum and  
771 maximum values, outlier data points are displayed as individual dots. Two-tailed Student's *t* test  
772 for transgene vs. *ral-R* \*\*\* $P < 0.001$ , \* $P < 0.05$ ; *ral-R*,  $n = 15$ ; 196.19.2,  $n = 10$ ; 196.7.3,  $n = 12$ ;  
773 196.14.5,  $n = 10$ .

774

775 **Figure 6. Interspecies expression of *SvRAI* or chimeric *SvRAI* as a transgene in the *ral-R***

776 **mutant background.** (A) *I62* cassette for interspecies expression of the *SvRAI* locus. (B) *I75*  
777 cassette for expression of the *SvRAI* coding region fused to the 2.9 kb *Zm* upstream region

778 including conserved non-coding *cis* sequences. (C) *ral-R* tassel. (D, E) *ral-R* tassels expressing  
779 162.26.1 (D) and 175.7 (E) transgenes. (F) *ral-R* ear. (G, H) *ral-R* ears expressing 162.26.1 (G)  
780 and 175.7 (H) transgenes. Scale bars, 2 cm. (I) Central spike length. (J) Branch zone length. (K)  
781 Number of long branches. (L) Number of spikelet multimers. (M) Number of ear branches. For  
782 all box and whisker plots, the bottom and top boxes represent the first and third quartile,  
783 respectively, the middle line is the median, and the whiskers represent the minimum and  
784 maximum values, outlier data points are displayed as individual dots. Two-tailed Student's *t* test  
785 for transgene vs. *ral-R* \*\*\* $P < 0.001$ ; *ral-R*,  $n = 15$ ; 162.26.1,  $n = 12$ ; 175.7,  $n = 9$ .

786 **REFERENCES**

- 787 **Abraham-Juarez, M.J., Schragger-Lavelle, A., Man, J., Whipple, C., Handakumbura, P.,**  
788 **Babbitt, C. and Bartlett, M.** (2020). Evolutionary variation in MADS-box dimerization affects  
789 floral development and protein degradation dynamics. *bioRxiv*. doi:10.1101/2020.03.09.984260.  
790
- 791 **Ahn, J.H., Miller, D., Winter, V.J., Banfield, M.J., Lee, J.H., Yoo, S.Y., Henz, S.R., Brady,**  
792 **R.L. and Weigel, D.** (2006). A divergent external loop confers antagonistic activity on floral  
793 regulators FT and TFL1. *EMBO J.* **25**: 605-614.  
794
- 795 **Arnaud, N., Lawrenson, T., Østergaard, L. and Sablowski, R.** (2011). The same regulatory  
796 point mutation changed seed-dispersal structures in evolution and domestication. *Curr. Biol* **21**:  
797 1215-1219.  
798
- 799 **Bailey, T.L. and Elkan, C.** (1994). Fitting a mixture model by expectation maximization to  
800 discover motifs in biopolymers. In Altman,R., Brutlag,D., Karp,P., Lathrop,R. and Searls,D.  
801 (eds), *Proceedings of the Second International Conference on Intelligent Systems for Molecular*  
802 *Biology*, AAAI Press, Menlo Park, CA, pp. 28–36.  
803
- 804 **Bailey, T.L. and Grant, C.E.** (2021). SEA: Simple Enrichment Analysis of  
805 motifs. *bioRxiv* doi: <https://doi.org/10.1101/2021.08.23.457422>.  
806
- 807 **Bartlett, M., Thompson, B., Brabazon, H., Del Gizzi, R., Zhang, T. and Whipple, C.** (2016).  
808 Evolutionary dynamics of floral homeotic transcription factor protein-protein interactions. *Mol.*  
809 *Biol. Evol.* **33**: 1486-1501.  
810
- 811 **Bennetzen, J.L., Schmutz, J., Wang, H., Percifield, R., Hawkins, J., Pontraoli, A.C., Estep,**  
812 **M., Feng, L., Vaughn, J.N., Grimwood, J, et al.** (2012). Reference genome sequence of the  
813 model plant *Setaria*. *Nat Biotechnol.* **30**: 555-561.  
814
- 815 **Blackman, B.K., Strasburg, J.L., Raduski, A.R., Michaels, S.D. and Riesberg, L.H.** (2010).  
816 The role of recently derived FT paralogs in sunflower domestication. *Curr. Biol.* **20**: 629-635.  
817
- 818 **Bomblies, K., Wang, R.L., Ambrose, B.A., Schmidt, R.J., Meeley, R.J. and Doebley, J.**  
819 (2003). Duplicate *FLORICAULA/LEAFY* homologs *zfl1* and *zfl2* control inflorescence  
820 architecture and flower patterning in maize. *Development* **130**: 2385-2395.  
821
- 822 **Bomblies, K. and Doebley, J.F.** (2005). Molecular evolution of *FLORICAULA/LEAFY*  
823 orthologs in the Andropogoneae (Poaceae). *Mol. Biol. Evol.* **22**: 1082-1094.  
824
- 825 **Bomblies, K. and Doebley, J.F.** (2006). Pleiotropic effects on the duplicate maize  
826 *FLORICAULA/LEAFY* genes *zfl1* and *zfl2* on traits under selection during maize domestication.  
827 *Genetics* **172**: 519-531.  
828
- 829 **Bommert, P., Je, B.I., Goldschmidt, A. and Jackson, D.** (2013). The maize  $G\alpha$  gene  
830 *COMPACT PLANT2* functions in *CLAVATA* signaling to control shoot meristem size. *Nature*  
831 **502**: 555-558.

- 832  
833 **Bortiri, E., Chuck, G., Vollbrecht, E., Rocheford, T., Martienssen, R. and Hake, S.** (2006).  
834 *ramosa2* encodes a LATERAL ORGAN BOUNDARY domain protein that determines the fate  
835 of stem cells in branch meristems of maize. *Plant Cell* **18**: 574-585.  
836  
837 **Brown, P.J., Klein, P.E., Bortiri, E., Acharay, C.B., Rooney, W.L. and Kresovich, S.** (2006).  
838 Inheritance of inflorescence architecture in sorghum. **113**: 931-942.  
839  
840 **Brown, P.J., Upadyayula, N., Mahone, G.S., Tian, F., Bradbury, P.J., Myles, S., Holland,**  
841 **J.B., Flint-Garcia, S., McMullen, M.D., Buckler, E.S. and Rocheford, T.R.** (2011). Distinct  
842 genetic architectures for male and female inflorescence traits of maize. *PLoS Genet.* **11**: 1002383.  
843  
844 **Carroll, S.B.** (2008). Evo-devo and an expanding evolutionary synthesis: a genetic theory of  
845 morphological evolution. *Cell* **134**: 25-36.  
846  
847 **Chuck, G., Meeley, R.B. and Hake, S.** (1998). The control of maize spikelet meristem fate by  
848 the *APETALA2*-like gene *indeterminant spikelet1*. *Gene Dev.* **12**: 1145-1154.  
849  
850 **Chuck, G., Muszynski, M., Kellogg, E., Hake, S. and Schmidt, R.J.** (2002). The control of  
851 spikelet meristem identity by the *branched silkless1* gene in maize. *Science.* **298**: 1238-1241.  
852  
853 **Chuck, G., Whipple, C, Jackson D. and Hake, S.** (2010). The maize SBP-box transcription  
854 factor encoded by *tasselsheath4* regulates bract development and the establishment of meristem  
855 boundaries. *Development* **137**: 1243-1250.  
856  
857 **Clark, R.M. Wagler, T.N. Quijada, P. and Doebley, J.** (2006) A distant upstream enhancer at  
858 the maize domestication gene *tb1* has pleiotropic effects on plant and inflorescent architecture.  
859 *Nat Genet.* **38**: 594-597.  
860  
861 **Clifford, H.T.** (1987). Spikelet and floral morphology. In *Grass Systematics and Evolution* (ed.  
862 T.R. Soderstrom, K.W. Hilu, C.S. Campbell and M.E. Barkworth), pp. 21-30. Washington, DC:  
863 Smithsonian Institution Press.  
864  
865 **Collins, G.** (1917). Hybrids of *Zea tunicate* and *Zea ramosa*. *Proc Natl Acad Sci USA* **3**: 345-  
866 349.  
867  
868 **Crowell, S., Korniliev, P., Falcão, A., Ismail, A., Gregorio, G., Mezey, J. and McCouch, S.**  
869 (2016). Genome-wide association and high-resolution phenotyping link *Oryza sativa* panicle  
870 traits to numerous trait-specific QTL clusters. *Nat Comm* **7**: 10527.  
871  
872 **Dathan, N., Zaccaro, L., Esposito, S., Isernia, C., Omichinski, J.G., Riccio, A., Pedone, C.,**  
873 **Di Blasio, B., Fattorusso, R. and Pedone, P.V.** (2002). The *Arabidopsis* SUPERMAN protein  
874 is able to specifically bind DNA through is single Cys<sub>2</sub>-His<sub>2</sub> zinc finger motif. *Nucleic Acids Res*  
875 **30**: 4945-4951.  
876

- 877 **Davidson, R.M., Gowda, M., Moghe, G., Lin, H., Vaillancourt, B., Shiu, S.H., Jiang, N. and**  
878 **Buell, C.R.** (2012). Comparative transcriptomics of three Poaceae species reveals patterns of  
879 gene expression evolution. *Plant J.* **71**: 492-502.  
880
- 881 **Dewey, C.N.** (2011). Positional orthology: putting genomic evolutionary relationships into  
882 context. *Brief Bioinform.* **12**: 401-12.  
883
- 884 **Doust, A.N., Devos, K.M., Gadberry, M.D., Gale, M.D. and Kellogg, E.A.** (2005). The  
885 genetic basis for inflorescence variation between foxtail and green millet (Poaceae). *Genetics*  
886 **169**: 1659-1672.  
887
- 888 **Doust, A.N. and Kellogg, E.A.** (2002). Inflorescence diversification in the panicoid “bristle  
889 grass” clade (Paniceae, Poaceae): evidence from molecular phylogenies and developmental  
890 morphology. *Am. J. Bot.* **89**: 1203-1222.  
891
- 892 **Eveland, A.L., Goldschmidt, A., Pautler, M., Morohashi, K., Liseron-Monfils, C., Lewis,**  
893 **M.W., Kumari, S., Hiraga, S., Yang, F., Unger-Wallace, E., Olson, A., Hake, S., Vollbrecht,**  
894 **E., Grotewold, E., Ware, D. and Jackson, D.** (2014). Regulatory modules controlling maize  
895 inflorescence architecture. *Genome Res.* **24**: 431-443.  
896
- 897 **Frame, B.R., Zhang, H., Cocciolone, S.M., Sidorenko, L.V., Dietrich, C.R., Pegg, S.E.,**  
898 **Zhen, S., Schnable, P.S., and Wang, K.** (2000) Production of transgenic maize from  
899 bombarded type II callus: Effect of gold particle size and callus morphology on transformation  
900 efficiency. *In Vitro Cell. Dev. Biol.-Plant* **36**: 21-29.  
901
- 902 **Gallavotti, A. Long, J.A., Stanfield, S., Yang, X., Jackson, D., Vollbrecht, E., and Schmidt,**  
903 **R.J.** (2010). The control of axillary meristem fate in the maize *ramosa* pathway. *Development*  
904 **137**: 2849-2856.  
905
- 906 **Gallavotti, A., Yang, Y., Schmidt, R.J. and Jackson D.** (2008). The relationship between  
907 auxin transport and maize branching. *Plant Physiol.* **147**: 1913-1923.  
908
- 909 **Galli, M., Feng, F. and Gallavotti, A.** (2020) Mapping regulatory determinants in plants. *Front.*  
910 *Genet.* **11**: 591194.  
911
- 912 **Galli, M., Khakhar, A., Lu, Z., Chen, Z., Sen, S., Joshi, T., Nemhauser, J.L., Schmitz, R.J.**  
913 **and Gallavotti, A.** (2018). The DNA binding landscape of the maize AUXIN RESPONSE  
914 FACTOR family. *Nat. Commun.* **9**: 4526.  
915
- 916 **Grant, C.E., Bailey, T.L. and Noble, W.S.** (2011). FIMO: scanning for occurrences of a given  
917 motif. *Bioinformatics* **27**: 1017-1018.  
918
- 919 **Harlan, J.R. and de Wet, J.M.J.** (1972). A simplified classification of cultivated sorghum.  
920 *Crop Sci.* **12**: 172-176.  
921

- 922 **Hiratsu, K., Mitsuda, N., Matsui, K. and Ohme-Takagi, M.** (2004). Identificaiton of the  
923 minimal repression domain of SUPERMAN shows that the DLELRL hexapeptide is both  
924 necessary and sufficient for repression of transcription in Arabidopsis. *Biochem Biophys Res*  
925 *Commun.* **321**: 172-178.
- 926  
927 **Hodge, J.G. and Doust, A.N.** (2017). Morphological development of *Setaria viridis* from  
928 germination to flowering. *Plant Genet. Genomics* **19**: 161-175.
- 929  
930 **Huang, P. and Feldman, M.** (2017) *Genetic Diversity and Geographic Distribution of North*  
931 *American Setaria viridis Populations*, in *Genetics and Genomics of Setaria*. Cham, Switz,;  
932 Springer.
- 933  
934 **Jackson, D., Veit, B. and Hake, S.** (1994). Expression of maize *KNOTTED1* related homeobox  
935 genes in the shoot apical meristem predicts patterns of morphogenesis in the vegetative shoot.  
936 *Development* **120**: 405-413.
- 937  
938 **Kellogg, E.A.** (2015). *Flowering Plants, Monocots: Poaceae*, Vol 13. *Families and Genera of*  
939 *Vascular Plants*. Cham, Switz,; Springer.
- 940  
941 **Kellogg, E.A., Camara, P.E.A.S, Rudall, P.J., Ladd, P., Malcomber, S.T., Whipple, C.J.**  
942 **and Doust, A.N.** (2013). Early inflorescence development in the grasses (Poaceae). *Front Plant*  
943 *Sci* **4**: 250.
- 944  
945 **Komari T., Takakura Y., Ueki J., Kato N., Ishida Y. and Hiei Y.** (2006) Binary Vectors  
946 and Super-binary Vectors. In: Wang K. (eds) *Agrobacterium Protocols*. *Methods in*  
947 *Molecular Biology*, vol 343. Humana Press.
- 948  
949 **Kusters, E., Della Pina, S., Castel, R., Souer, E. and Koes, R.** (2015). Chances in *cis*-  
950 regulatory elements of key floral regulators are associated with divergence of inflorescence  
951 architectures. *Development* **142**: 2822-2831.
- 952  
953 **Leiboff, S. and Hake, S.** (2019) Reconstructing the transcriptional ontogeny of maize and  
954 sorghum supports an inverse hourglass model of inflorescence development. *Curr Biol.* **29**:  
955 3410-3419.
- 956  
957 **Lemmon, Z.H., Park, S.J., Jiang, K., Van Eck, J., Schatz, M.C. and Lippman, Z.B.** (2016)  
958 The evolution of inflorescence diversity in the nightshades and heterochrony during meristem  
959 maturation. *Genome Res* **26**: 1676-1686.
- 960  
961 **Li, M., Shao, M.R., Zeng, D., Ju, T., Kellogg, E.A. and Topp, C.N.** (2020). Comprehensive  
962 3D phenotyping reveals continuous morphological variation across genetically diverse sorghum  
963 inflorescences. *New Phytol.* doi:10.1111/nph.16533.
- 964  
965 **Liu, X., Galli, M., Camehl, I. and Gallavotti, A.** (2019). RAMOSA1 ENHANCER LOCUS2-  
966 mediated transcriptional repression regulates vegetative and reproductive architecture. *Plant*  
967 *Physiol.* **179**: 348-363.



968  
969 **Lu, Z., Marand, A.P., Ricci, W.A., Ethridge, C.L., Zhang, X. and Schmitz, R.J.** (2019). The  
970 prevalence, evolution and chromatin signatures of plant regulatory elements. *Nat. Plants* **5**: 1250-  
971 1259.  
972  
973 **Maizel, A., Busch, M.A., Tanahashi, T., Perkovic, J., Kato, M., Hasebe, M. and Weigel, D.**  
974 (2005). The floral regulator LEAFY evolves by substitutions in the DNA binding domain.  
975 *Science* **308**: 260-263.  
976  
977 **Mitros, T., Session, A.M., James, B.T., Wu, G.A., Belaffif, M.B., Clark, L.V., Shu, S., Dong,**  
978 **H., Barling, A., Holmes, J.R., et al.** (2020). Genome biology of the paleotetraploid perennial  
979 biomass crop *Miscanthus*. *Nat. Commun.* **11**: 5442.  
980  
981 **Nikolov, L.A. and Tsiantis, M.** (2015). Interspecies gene transfer as a method for understanding  
982 the genetic basis for evolutionary change: progress, pitfalls and prospects. *Front Plant Sci* **6**:  
983 1135.  
984  
985 **Perez-Limón, S., Li, M., Cintora-Martinez, C., Aguilar-Rangel, M.R., Salazar-Vidal, M.N.,**  
986 **González-Segovia, E., Blöcher-Juárez, K., Guerrero-Zavala, A., Barrales-Gamez, B.,**  
987 **Caracaño-Macias, J., et al.** (2021). A B73  
988 x Palomero Toluqueño mapping population reveals local adaptation in Mexican highland maize.  
989 bioRxiv doi: <https://doi.org/10.1101/2021.09.15.460568>  
990  
991 **Prusinkiewicz, P., Erasmus, Y., Lane, B., Harder, L.D. and Coen, E.** (2007). Evolution and  
992 development of inflorescence architectures. *Science* **316**: 1452-1456.  
993  
994 **Upadyayula, N., da Silva, H.S., Bohn, M.O. and Rocheford, T.R.** (2006a). Genetic and QTL  
995 analysis of maize tassel and ear inflorescence architecture. *Theor App Genet* **112**: 592-606.  
996  
997 **Upadyayula, N., Wassom, J., Bohn, M.O. and Rocheford, T.R.** (2006b). Quantitative trait loci  
998 analysis of phenotypic traits and principle components of maize tassel inflorescence architecture.  
999 *Theor App Genet* **113**: 1395-1407.  
1000  
1001 **Ricci, W.A., Lu, Z., Ji, L., Marand, A.P., Ethridge, C.L., Murphy, N.G., Noshay, J.M.,**  
1002 **Galli, M., Mejía-Guerra, M.K. Colomé-Tatché, M., et al.** (2019). Widespread long-range *cis*-  
1003 regulatory elements in the maize genome. *Nat. Plants* **5**: 1237-1249.  
1004  
1005 **Satoh-Nagasawa, N., Nagasawa, N., Malcomber, S., Sakai, H. and Jackson, D.** (2006). A  
1006 trehalose metabolic enzyme controls inflorescence architecture in maize. *Nature.* **441**: 227-230.  
1007  
1008 **Sayou, C., Monniaux, M., Nanao, M.H., Moyroud, E., Brockington, S.F., Thévenon, E.,**  
1009 **Chahtane, H., Warthmann, N., Melkonian, M., Zhang, Y., Wong, G.K.S., Weigel, D.,**  
1010 **Parcy, F. and Dumas, R.** (2014). A promiscuous intermediate underlies the evolution of  
1011 LEAFY DNA binding specificity. **343**: 645-648.  
1012

- 1013 **Schnable, J.C.** (2015). Genome evolution in maize: from genomes back to genes. *Annu Rev*  
1014 *Plant Biol.* **66**: 329-343.
- 1015  
1016 **Schnable, J.** (2019). Grass Syntenic Gene List sorghum v3 maize v3/4 with teff and oropetium  
1017 v2. Figshare. Available at: [https://figshare.com/ articles/Grass\\_-](https://figshare.com/articles/Grass_Syntenic_Gene_List_sorghum_v3_maize_v3_4_with_teff_and_oropetium_v2/7926674/1)  
1018 *Syntenic\_Gene\_List\_sorghum\_v3\_maize\_v3\_4\_with\_teff\_and\_oropetium\_v2/7926674/1*  
1019
- 1020 **Schnable, J.C. and Freeling, M.** (2011). Genes identified by visible mutant phenotypes show  
1021 increased bias toward one of two subgenomes of maize. *PLoS ONE* **6**: e17855.  
1022
- 1023 **Sigmon, B.A.** (2010). *ramosa1* in the development and evolution of inflorescence architecture in  
1024 grasses. PhD dissertation. Iowa State University, Ames, IA.  
1025
- 1026 **Sigmon, B. and Vollbrecht, E.** (2010). Evidence of selection at the *ramosa1* locus during maize  
1027 domestication. *Mol Ecol* **19**: 1296-1311.  
1028
- 1029 **Strable, J. and Vollbrecht, E.** (2019). Maize *YABBY* genes *drooping leaf1* and *drooping leaf2*  
1030 regulate floret development and floral meristem determinacy. *Development* **146**: dev171181.  
1031
- 1032 **Strable, J., Wallace, J.G., Unger-Wallace, E., Briggs, S., Bradbury, P., Buckler, E.S. and**  
1033 **Vollbrecht, E.** (2017). Maize *YABBY* Genes *drooping leaf1* and *drooping leaf2* regulating plant  
1034 architecture. *Plant Cell* **29**: 1622-1641.  
1035
- 1036 **Studer, A., Zhao, Q., Ross-Ibarra, J., Doebley, J.** (2011). Identification of a functional  
1037 transposon insertion in the maize domestication gene *tb1*. *Nat Genet* **43**: 1160-1163.  
1038
- 1039 **Swigoňová, Z., Lai, J., Ma, J., Ramakrishna, W., Llaca, V., Bennetzen, J.L. and Messing, J.**  
1040 (2004). Close split of sorghum and maize genome progenitors. *Genome Res.* **14**: 1916-1923.  
1041
- 1042 **Tiwari, S.B., Hagen, G. and Guilfoyle, T.J.** (2004). Aux/IAA proteins contain a potent  
1043 transcriptional repression domain. *Plant Cell* **16**: 533-543.  
1044
- 1045 **Vollbrecht, E. and Schmidt, R.J.** (2009). Development of the inflorescences. In: *Handbook of*  
1046 *Maize: Its Biology*. Springer, N.Y. pp. 13-40.  
1047
- 1048 **Vollbrecht, E., Springer, P.S., Goh, L., Buckler, E.S. and Martienssen, R.** (2005).  
1049 Architecture of floral branch systems in maize and related grasses. *Nature* **436**: 1119-1126.  
1050
- 1051 **Wang, B., Regulsky, M., Tseng, E., Olson, A., Goodwin, S., McCombie, W.R. and Ware, D.**  
1052 (2018). A comparative transcriptional landscape of maize and sorghum obtained by single-  
1053 molecule sequencing. *Genome Res.* **28**: 921-932.  
1054
- 1055 **Wang, H., Nussbaum-Wagler, T., Li, B., Zhao, Q., Vigouroux, Y., Faller, M., Bomblies, K.,**  
1056 **Lukens, L. and Doebley, J.F.** (2005). The origin of the naked grains of maize. *Nature* **436**: 714-  
1057 719.  
1058

- 1059 **Weeks, B.L.** (2013). Inflorescence branching in maize: a quantitative genetics approach to  
1060 identifying key players in the inflorescence development pathway. PhD dissertation. Iowa State  
1061 University, Ames, IA  
1062
- 1063 **Whipple, C.J.** (2017). Grass inflorescence architecture and evolution: the origin of novel  
1064 signaling centers. *New Phytol.* **216**: 367-372.  
1065
- 1066 **Whipple, C.J., Hall, D.H., DeBlasio, S., Taguchi-Shiobara, F., Schmidt, R.J. and Jackson,**  
1067 **D.P.** (2010). A conserved mechanism of bract suppression in the grass family. *Plant Cell* **22**:  
1068 565-578.  
1069
- 1070 **William, D.A., Su, Y., Smith, M.R., Lu, M., Baldwin, D.A. and Wagner, D.** (2004). Genomic  
1071 identification of direct target genes of LEAFY. *Proc Natl Acad Sci USA* **101**: 1775-1780.  
1072
- 1073 **Wills, D.M., Whipple, C.J., Takuno, S., Kursel, L.E., Shannon, L.M., Ross-Ibarra, J. and**  
1074 **Doebley, J.F.** (2013). From many, one: genetic control of prolificacy during maize  
1075 domestication. *PLoS Genet.* **9**: e1003604.  
1076
- 1077 **Winter, C.M., Austin, R.S., Blanvillain-Baufumé, S., Reback, M.A., Monniaux, M., Wu,**  
1078 **M.F., Sang, Y., Yamaguchi, A., Yamaguchi, N., Parker, J.E., et al.** (2011). LEAFY target  
1079 genes reveal floral regulatory logic, cis motifs, and a link to biotic stimulus response. *Dev Cell*  
1080 **20**: 430-443.  
1081
- 1082 **Wu, X., Li, Y., Shi, Y., Song, Y., Zhang, D., Li, C., Buckler, E.S., Li, Y., Zhang, Z. and**  
1083 **Wang, T.** (2016). Joint linkage mapping and GWAS reveal extensive genetic loci that regulate  
1084 male inflorescence size in maize. *Plant Biotechnol J* **14**: 1551-1562.  
1085
- 1086 **Xu, G., Wang, X., Huang, C., Xu, D., Li, D., Tian, J., Chen, Q., Wang, C., Liang, Y., Wu,**  
1087 **Y., Yang, X. and Tian, F.** (2017). Complex genetic architecture underlies maize tassel  
1088 domestication. *New Phytol.* **214**: 852-864.  
1089
- 1090 **Yamaki, S., Miyabayashi, T., Eiguchi, M., Kitano, H., Nonomura, K.I. and Kurata, N.**  
1091 (2010). Diversity of panicle branching patterns of wild relatives of rice. *Breeding Sci* **60**: 586-  
1092 596.  
1093
- 1094 **Zhang, G., Liu, X., Quan, Z., Cheng, S., Xu, X., Pan, S., Xie, M., Zeng, P., Yue, Z., Wang,**  
1095 **W., et al.** (2012). Genome sequence of foxtail millet (*Setaria italica*) provides insights into grass  
1096 evolution and biofuel potential. *Nat Biotechnol.* **30**: 549-554.  
1097
- 1098 **Zhou, Y., Srinivasan, S., Mirnezami, S.V., Kusmec, A., Fu, Q., Attigala, L., Salas**  
1099 **Fernandes, M.G., Ganapathysubramanian, B. and Schnable, P.S.** (2019). Semiautomated  
1100 feature extraction from RGB images for Sorghum panicle architecture GWAS. *Plant Physiol.*  
1101 **179**: 24-37.  
1102

1103 **Zhu, C., Yang, J., Box, M.S., Kellogg, E.A. and Eveland, A.L.** (2018). A dynamic co-  
1104 expression map of early inflorescence development in *Setaria viridis* provides a resource for  
1105 gene discovery and comparative genomics. *Front Plant Sci* **9**: 1309.

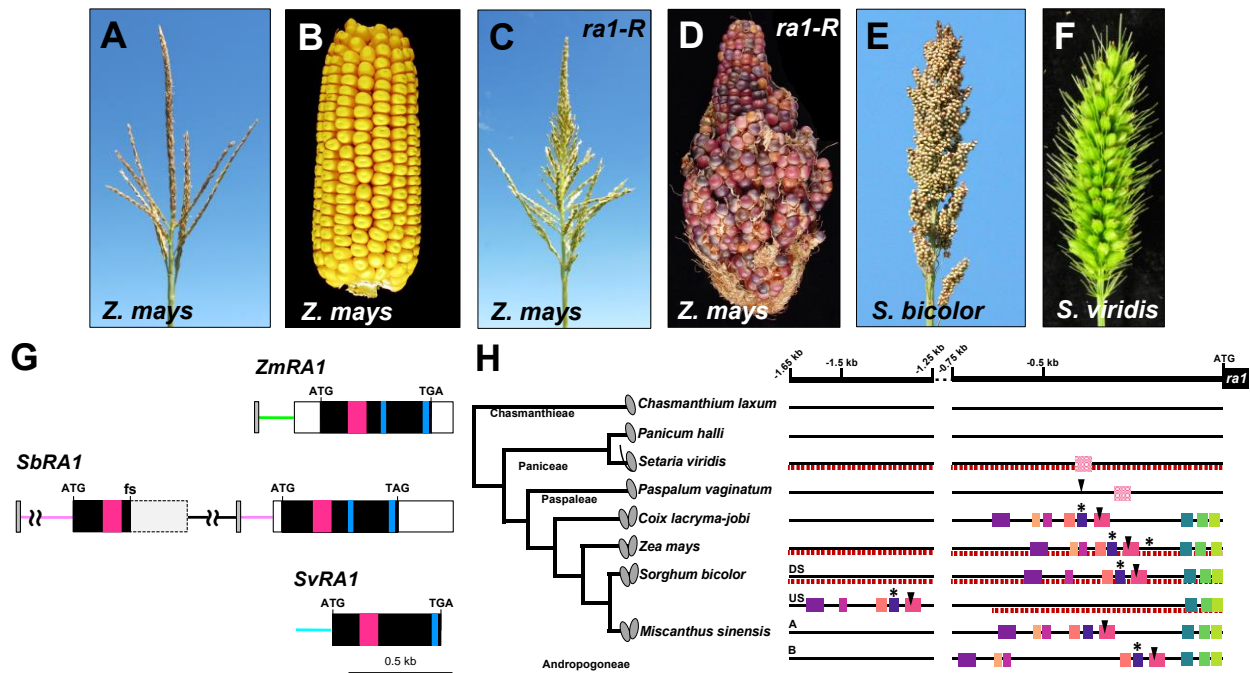

**Figure 1. Architecture of maize, maize *ra1-R* mutant, sorghum and *S. viridis* inflorescences and genomic relationship of *RAI*.** Normal inbred B73 maize tassel (A) and ear (B). Maize *ra1-R* mutant tassel (C) and ear (D). (E) *S. bicolor* panicle. (F) *S. viridis* panicle. (A-F) Inflorescences not to scale. (G) Annotated gene structure for *RAI* homologs. Tandem duplication of *SbRA1* locus is shown with indicated frameshift mutation (fs) in upstream copy of *SbRA1*. Predicted promoter regions are indicated by color lines. Gray box, conserved non-coding *cis* sequences (see 1H). Open box, UTR sequences. Magenta box, encoded C<sub>2</sub>H<sub>2</sub> zinc finger domain. Blue box, encoded EAR motif. (H) Conserved non-coding *cis* sequences in the *RAI* promoters of Panicoid grasses. Among species in the tribe Andropogoneae, the promoter regions of *RAI* display different motifs conserved in sequence and arrangement (correspondingly colored boxes are conserved; Fig. S3C) compared to other tribes in the Panicoideae family. Upstream (US) and downstream (DS) tandem duplicate *SbRA1* copies and duplicate *MsRA1* copies A and B are indicated. Dashed lines underscore promoter regions incorporated into transgene cassettes. Some conserved sequences contained binding motifs for well-known transcriptional regulators, such as LEAFY and Clade A ARFs (Fig. S3B). Solid squares,  $P$ -values  $\leq 1^{-20}$ ; cross-hatched squares,  $P$ -values  $\leq 1^{-05}$ ; arrowhead – LEAFY-binding motifs; asterisks – Clade A ARF-binding motifs. Character state of spikelets (paired, single or with a bristle) is indicated on the phylogeny.

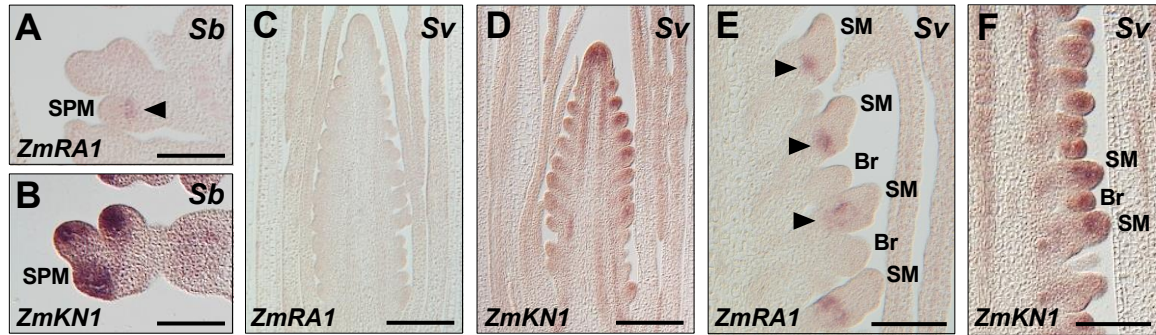

**Figure 2. RNA *in situ* hybridization in sorghum and *S. viridis* inflorescences.** Antisense RNA probes to *ZmRA1* (A, C, E) or *ZmKN1* (B, D, F) were hybridized to longitudinal sections of developing inflorescences from sorghum, *Sb* (A, B) or *S. viridis*, *Sv* (C-F). Arrowheads denote *RA1* transcript accumulation in boundary domains. Scale bars, 100 μm.

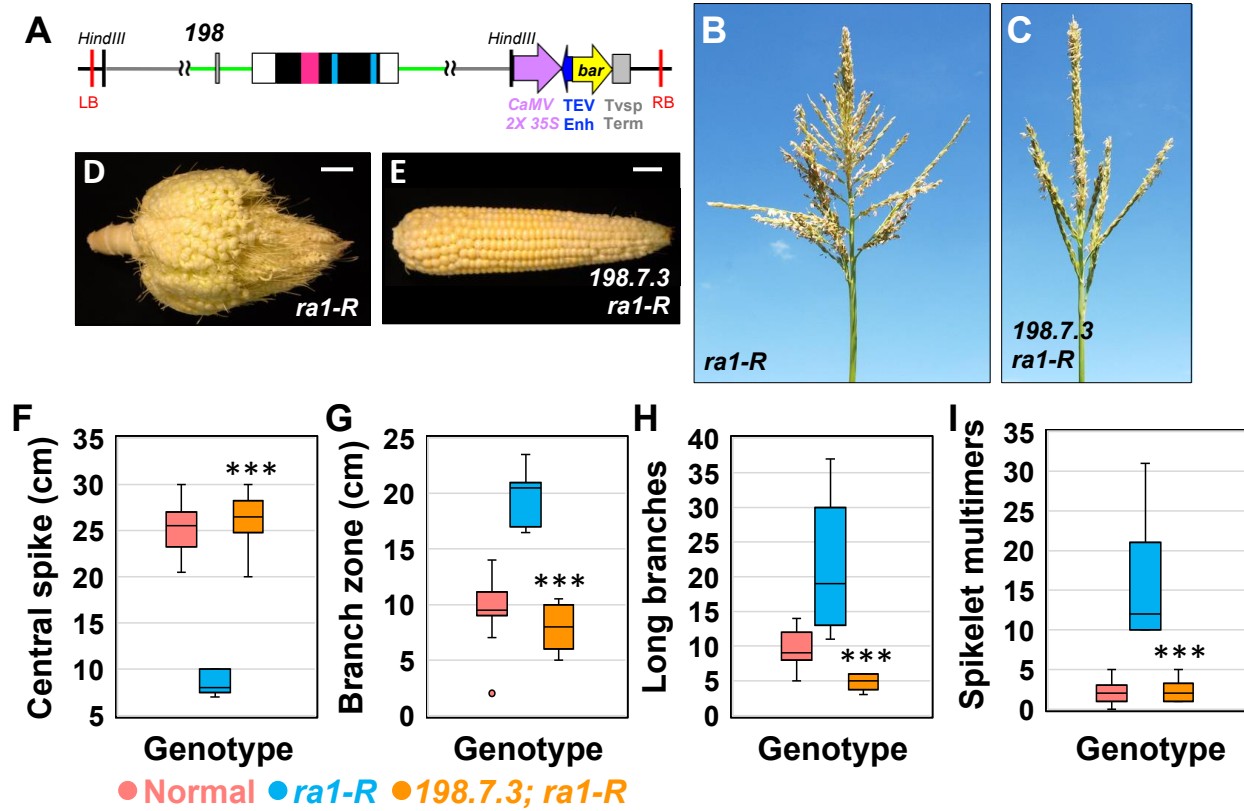

**Figure 3. Expression of the *ZmRAI* locus as a transgene in *ra1-R* mutant background.** (A) 198 cassette for expression of *ZmRAI* containing 2.9 kb of upstream sequence including conserved non-coding *cis* regions. (B) *ra1-R* tassel. (C) *ra1-R* tassel expressing 198.7.3. (D) *ra1-R* ear. (E) *ra1-R* ear expressing 198.7.3. Scale bars, 2 cm. (F) Central spike length. (G) Branch zone length. (H) Number of long branches. (I) Number of spikelet multimers. For all box and whisker plots, the bottom and top boxes represent the first and third quartile, respectively, the middle line is the median, and the whiskers represent the minimum and maximum values, outlier data points are displayed as individual dots. Two-tailed Student's *t* test for transgene vs. *ra1-R* \*\*\**P*<0.001; normal, n = 20; *ra1-R*, n = 10; 198.7.3, n = 8.

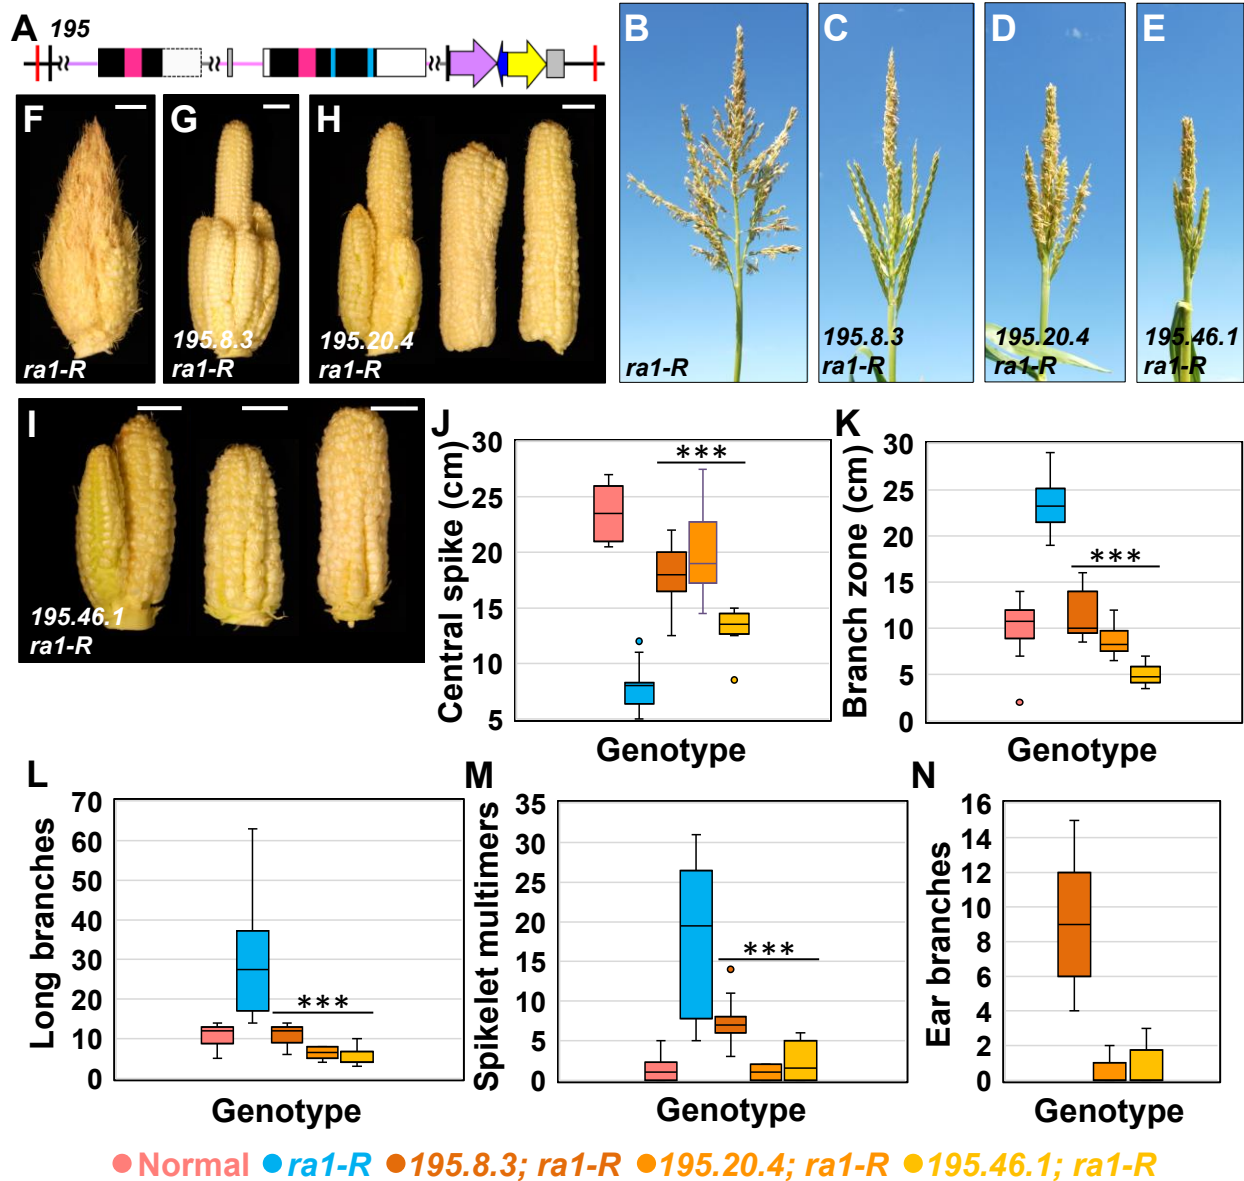

**Figure 4. Interspecies expression of the tandem duplicated *SbRAI* modeled transgene in the *ra1-R* mutant background.** (A) 195 cassette for interspecies expression of the tandem duplicated *SbRAI* locus. (B) *ra1-R* tassel. (C-E) *ra1-R* tassels expressing 195.8.3 (C), 195.20.4 (D) and 195.46.1 (E) transgenes. (F) *ra1-R* ear. (G-I) *ra1-R* ears expressing 195.8.3 (G), 195.20.4 (H) and 195.46.1 (I) transgenes. Scale bars, 2 cm. (J) Central spike length. (K) Branch zone length. (L) Number of long branches. (M) Number of spikelet multimers. (N) Number of ear branches. For all box and whisker plots, the bottom and top boxes represent the first and third quartile, respectively, the middle line is the median, and the whiskers represent the minimum and maximum values, outlier data points are displayed as individual dots. Two-tailed Student's *t* test for transgene vs. *ra1-R* \*\*\* $P < 0.001$ ; *ra1-R*,  $n = 18$ ; 195.8.3,  $n = 11$ ; 195.20.4,  $n = 12$ ; 195.46.1,  $n = 11$ .



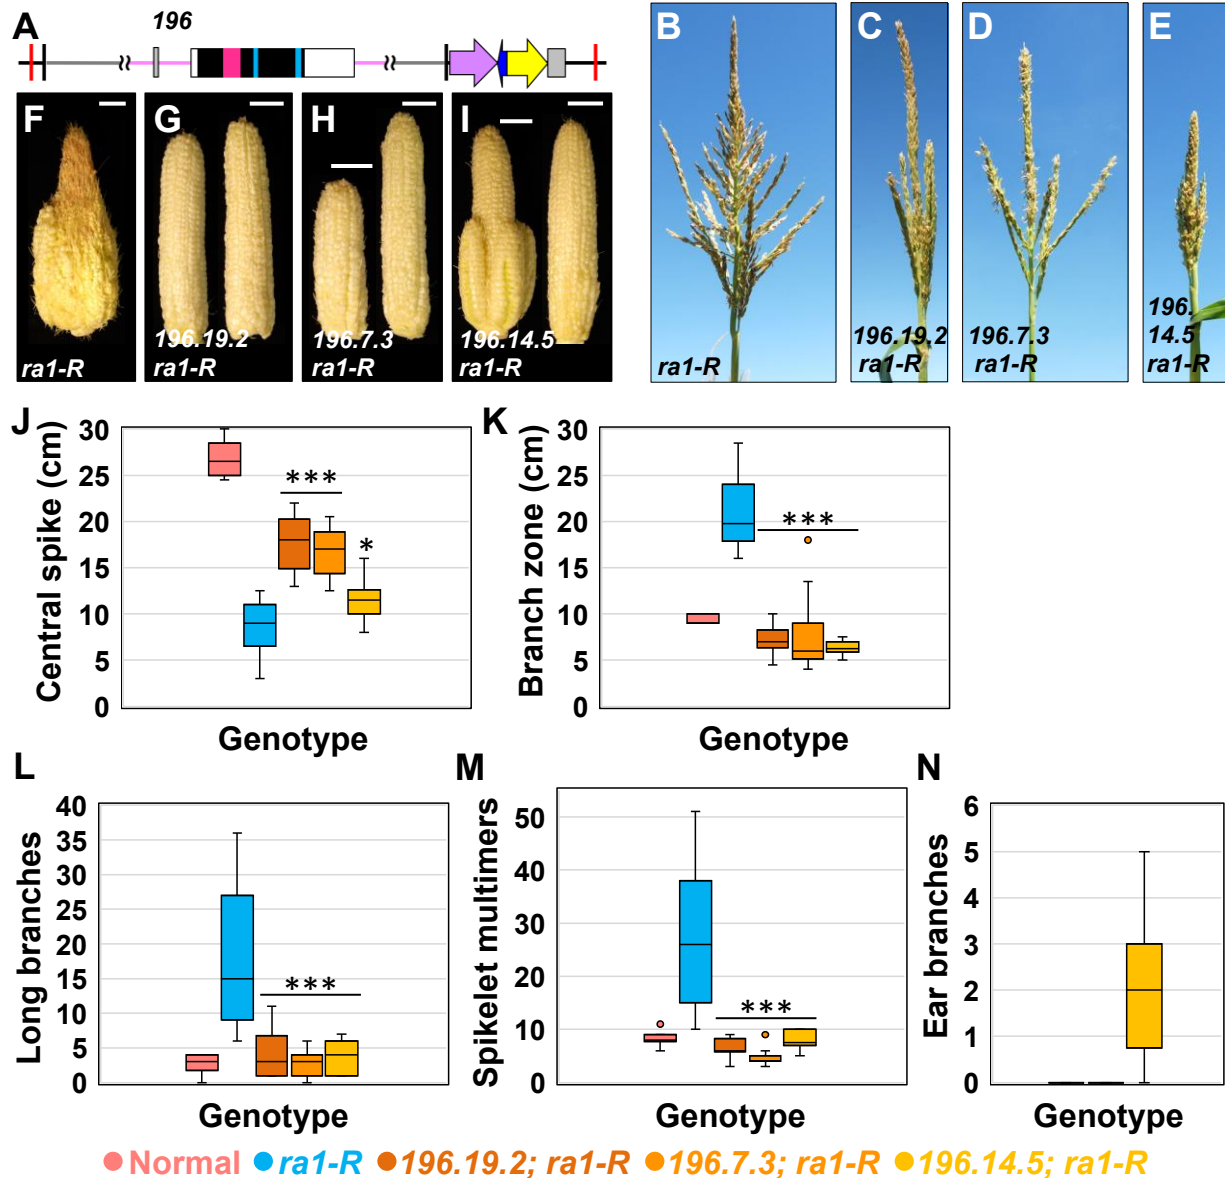

**Figure 5. Interspecies expression of the downstream *SbRA1* modeled transgene in the *ra1-R* mutant background.** (A) *196* cassette for interspecies expression of the downstream *SbRA1* locus. (B) *ra1-R* tassel. (C-E) *ra1-R* tassels expressing 196.19.2 (C), 196.7.3 (D) and 196.14.5 (E) transgenes. (F) *ra1-R* ear. (G-I) *ra1-R* ears expressing 196.19.2 (G), 196.7.3 (H) and 196.14.5 (I) transgenes. Scale bars, 2 cm. (J) Central spike length. (K) Branch zone length. (L) Number of long branches. (M) Number of spikelet multimers. (N) Number of ear branches. For all box and whisker plots, the bottom and top boxes represent the first and third quartile, respectively, the middle line is the median, and the whiskers represent the minimum and maximum values, outlier data points are displayed as individual dots. Two-tailed Student's *t* test for transgene vs. *ra1-R* \*\*\* $P < 0.001$ , \* $P < 0.05$ ; *ra1-R*,  $n = 15$ ; 196.19.2,  $n = 10$ ; 196.7.3,  $n = 12$ ; 196.14.5,  $n = 10$ .

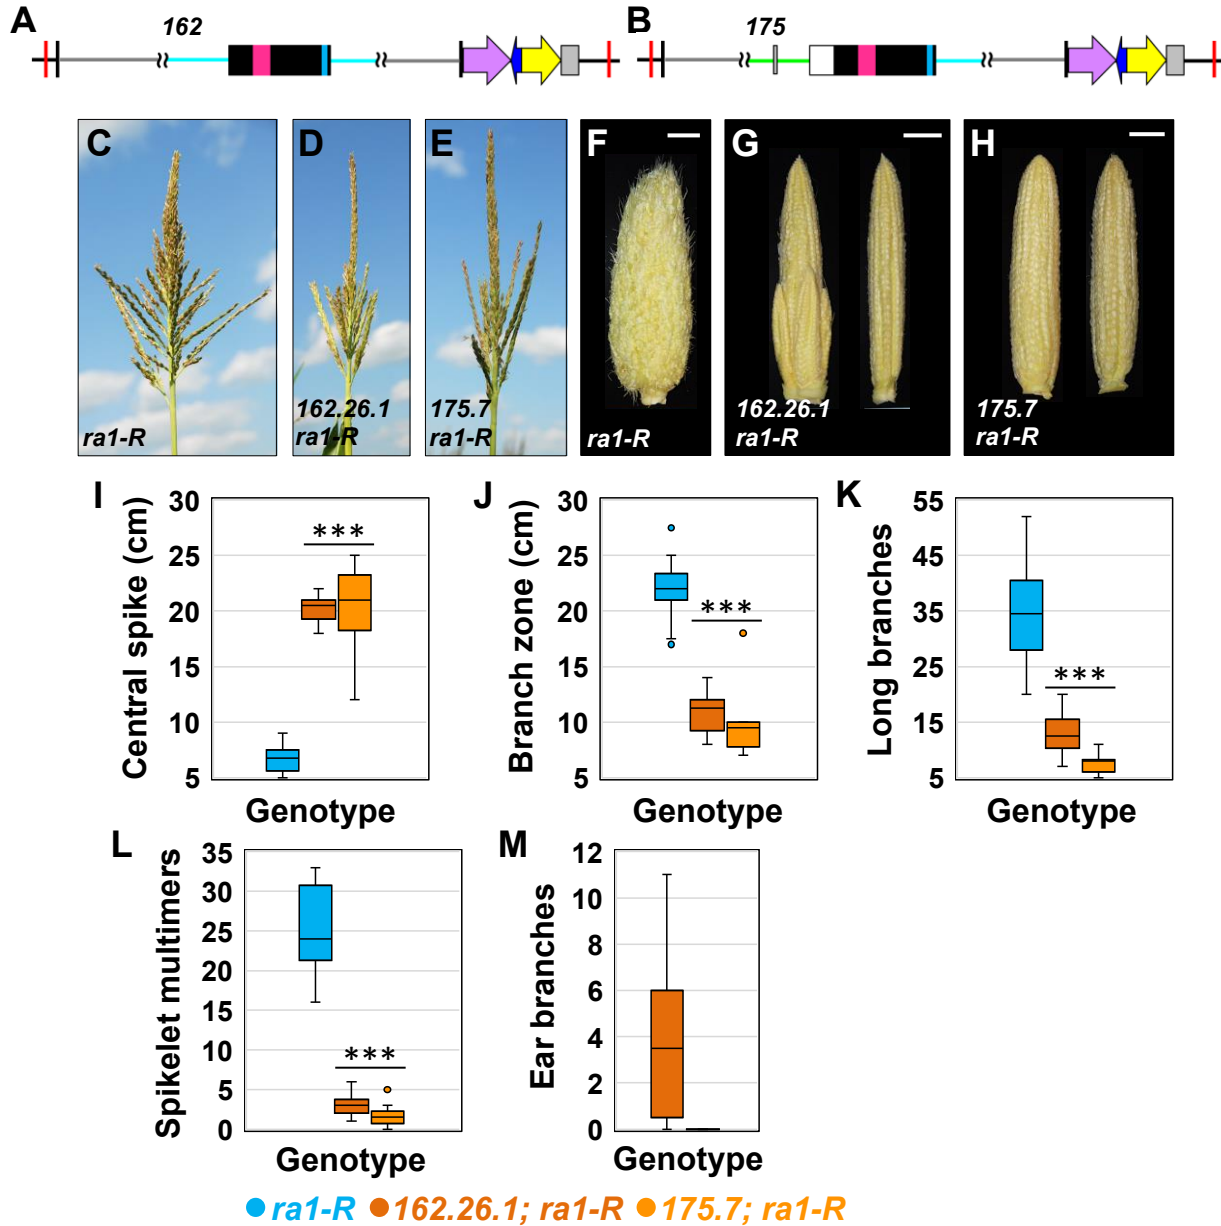

**Figure 6. Interspecies expression of *SvRAI* or chimeric *SvRAI* as a transgene in the *ra1-R* mutant background.** (A) 162 cassette for interspecies expression of the *SvRAI* locus. (B) 175 cassette for expression of the *SvRAI* coding region fused to the 2.9 kb *Zm* upstream region including conserved non-coding *cis* sequences. (C) *ra1-R* tassel. (D, E) *ra1-R* tassels expressing 162.26.1 (D) and 175.7 (E) transgenes. (F) *ra1-R* ear. (G, H) *ra1-R* ears expressing 162.26.1 (G) and 175.7 (H) transgenes. Scale bars, 2 cm. (I) Central spike length. (J) Branch zone length. (K) Number of long branches. (L) Number of spikelet multimers. (M) Number of ear branches. For all box and whisker plots, the bottom and top boxes represent the first and third quartile, respectively, the middle line is the median, and the whiskers represent the minimum and maximum values, outlier data points are displayed as individual dots. Two-tailed Student's *t* test for transgene vs. *ra1-R* \*\*\**P*<0.001; *ra1-R*, n = 15; 162.26.1, n = 12; 175.7, n = 9.

## Parsed Citations

**Abraham-Juarez, M.J., Schragger-Lavelle, A., Man, J., Whipple, C., Handakumbura, P., Babbitt, C. and Bartlett, M. (2020). Evolutionary variation in MADS-box dimerization affects floral development and protein degradation dynamics. bioRxiv. doi:10.1101/2020.03.09.984260.**

Google Scholar: [Author Only](#) [Title Only](#) [Author and Title](#)

**Ahn, J.H., Miller, D., Winter, V.J., Banfield, M.J., Lee, J.H., Yoo, S.Y., Henz, S.R., Brady, R.L. and Weigel, D. (2006). A divergent external loop confers antagonistic activity on floral regulators FT and TFL1. EMBO J. 25: 605-614.**

Google Scholar: [Author Only](#) [Title Only](#) [Author and Title](#)

**Arnaud, N., Lawrenson, T., Østergaard, L. and Sablowski, R. (2011). The same regulatory point mutation changed seed-dispersal structures in evolution and domestication. Curr. Biol 21: 1215-1219.**

Google Scholar: [Author Only](#) [Title Only](#) [Author and Title](#)

**Bailey, T.L. and Elkan, C. (1994). Fitting a mixture model by expectation maximization to discover motifs in biopolymers. In Altman, R., Brutlag, D., Karp, P., Lathrop, R. and Searls, D. (eds), Proceedings of the Second International Conference on Intelligent Systems for Molecular Biology, AAAI Press, Menlo Park, CA, pp. 28–36.**

Google Scholar: [Author Only](#) [Title Only](#) [Author and Title](#)

**Bailey, T.L. and Grant, C.E. (2021). SEA: Simple Enrichment Analysis of motifs. bioRxiv doi: <https://doi.org/10.1101/2021.08.23.457422>.**

Google Scholar: [Author Only](#) [Title Only](#) [Author and Title](#)

**Bartlett, M., Thompson, B., Brabazon, H., Del Gizzi, R., Zhang, T. and Whipple, C. (2016). Evolutionary dynamics of floral homeotic transcription factor protein-protein interactions. Mol. Biol. Evol. 33: 1486-1501.**

Google Scholar: [Author Only](#) [Title Only](#) [Author and Title](#)

**Bennetzen, J.L., Schmutz, J., Wang, H., Percifield, R., Hawkins, J., Ponraoli, A.C., Estep, M., Feng, L., Vaughn, J.N., Grimwood, J., et al. (2012). Reference genome sequence of the model plant *Setaria*. Nat Biotechnol. 30: 555-561.**

Google Scholar: [Author Only](#) [Title Only](#) [Author and Title](#)

**Blackman, B.K., Strasburg, J.L., Raduski, A.R., Michaels, S.D. and Riesberg, L.H. (2010). The role of recently derived FT paralogs in sunflower domestication. Curr. Biol. 20: 629-635.**

Google Scholar: [Author Only](#) [Title Only](#) [Author and Title](#)

**Bombliès, K., Wang, R.L., Ambrose, B.A., Schmidt, R.J., Meeley, R.J. and Doebley, J. (2003). Duplicate FLORICAULA/LEAFY homologs *zfl1* and *zfl2* control inflorescence architecture and flower patterning in maize. Development 130: 2385-2395.**

Google Scholar: [Author Only](#) [Title Only](#) [Author and Title](#)

**Bombliès, K. and Doebley, J.F. (2005). Molecular evolution of FLORICAULA/LEAFY orthologs in the Andropogoneae (Poaceae). Mol. Biol. Evol. 22: 1082-1094.**

Google Scholar: [Author Only](#) [Title Only](#) [Author and Title](#)

**Bombliès, K. and Doebley, J.F. (2006). Pleiotropic effects on the duplicate maize FLORICAULA/LEAFY genes *zfl1* and *zfl2* on traits under selection during maize domestication. Genetics 172: 519-531.**

Google Scholar: [Author Only](#) [Title Only](#) [Author and Title](#)

**Bommert, P., Je, B.I., Goldschmidt, A. and Jackson, D. (2013). The maize *Ga* gene COMPACT PLANT2 functions in CLAVATA signaling to control shoot meristem size. Nature 502: 555-558.**

Google Scholar: [Author Only](#) [Title Only](#) [Author and Title](#)

**Bortiri, E., Chuck, G., Vollbrecht, E., Rocheford, T., Martienssen, R. and Hake, S. (2006). *ramosa2* encodes a LATERAL ORGAN BOUNDARY domain protein that determines the fate of stem cells in branch meristems of maize. Plant Cell 18: 574-585.**

Google Scholar: [Author Only](#) [Title Only](#) [Author and Title](#)

**Brown, P.J., Klein, P.E., Bortiri, E., Acharay, C.B., Rooney, W.L. and Kresovich, S. (2006). Inheritance of inflorescence architecture in sorghum. 113: 931-942.**

Google Scholar: [Author Only](#) [Title Only](#) [Author and Title](#)

**Brown, P.J., Upadaya, N., Mahone, G.S., Tian, F., Bradbury, P.J., Myles, S., Holland, J.B., Flint-Garcia, S., McMullen, M.D., Buckler, E.S. and Rocheford, T.R. (2011). Distinct genetic architectures for male and female inflorescence traits of maize. PLoS Genet. 11: 1002383.**

Google Scholar: [Author Only](#) [Title Only](#) [Author and Title](#)

**Carroll, S.B. (2008). Evo-devo and an expanding evolutionary synthesis: a genetic theory of morphological evolution. Cell 134: 25-36.**

Google Scholar: [Author Only](#) [Title Only](#) [Author and Title](#)

**Chuck, G., Meeley, R.B. and Hake, S. (1998). The control of maize spikelet meristem fate by the APETALA2-like gene**

**indeterminant spikelet1. Gene Dev. 12: 1145-1154.**

Google Scholar: [Author Only](#) [Title Only](#) [Author and Title](#)

**Chuck, G., Muszynski, M., Kellogg, E., Hake, S. and Schmidt, R.J. (2002). The control of spikelet meristem identity by the branched silkless1 gene in maize. Science. 298: 1238-1241.**

Google Scholar: [Author Only](#) [Title Only](#) [Author and Title](#)

**Chuck, G., Whipple, C., Jackson D. and Hake, S. (2010). The maize SBP-box transcription factor encoded by tasselsheath4 regulates bract development and the establishment of meristem boundaries. Development 137: 1243-1250.**

Google Scholar: [Author Only](#) [Title Only](#) [Author and Title](#)

**Clark, R.M. Wagler, T.N. Quijada, P. and Doebley, J. (2006) A distant upstream enhancer at the maize domestication gene tb1 has pleiotropic effects on plant and inflorescent architecture. Nat Genet. 38: 594-597.**

Google Scholar: [Author Only](#) [Title Only](#) [Author and Title](#)

**Clifford, H.T. (1987). Spikelet and floral morphology. In Grass Systematics and Evolution (ed. T.R. Soderstrom, K.W. Hilu, C.S. Campbell and M.E. Barkworth), pp. 21-30. Washington, DC: Smithsonian Institution Press.**

Google Scholar: [Author Only](#) [Title Only](#) [Author and Title](#)

**Collins, G. (1917). Hybrids of Zea tunicate and Zea ramosa. Proc Natl Acad Sci USA 3: 345-349.**

Google Scholar: [Author Only](#) [Title Only](#) [Author and Title](#)

**Crowell, S., Korniliev, P., Falcão, A., Ismail, A., Gregorio, G., Mezey, J. and McCouch, S. (2016). Genome-wide association and high-resolution phenotyping link Oryza sativa panicle traits to numerous trait-specific QTL clusters. Nat Comm 7: 10527.**

Google Scholar: [Author Only](#) [Title Only](#) [Author and Title](#)

**Dathan, N., Zaccaro, L., Esposito, S., Isernia, C., Omichinski, J.G., Riccio, A., Pedone, C., Di Blasio, B., Fattorusso, R. and Pedone, P.V. (2002). The Arabidopsis SUPERMAN protein is able to specifically bind DNA through its single Cys2-His2 zinc finger motif. Nucleic Acids Res 30: 4945-4951.**

Google Scholar: [Author Only](#) [Title Only](#) [Author and Title](#)

**Davidson, R.M., Gowda, M., Moghe, G., Lin, H., Vaillancourt, B., Shiu, S.H., Jiang, N. and Buell, C.R. (2012). Comparative transcriptomics of three Poaceae species reveals patterns of gene expression evolution. Plant J. 71: 492-502.**

Google Scholar: [Author Only](#) [Title Only](#) [Author and Title](#)

**Dewey, C.N. (2011). Positional orthology: putting genomic evolutionary relationships into context. Brief Bioinform. 12: 401-12.**

Google Scholar: [Author Only](#) [Title Only](#) [Author and Title](#)

**Doust, A.N., Devos, K.M., Gadberry, M.D., Gale, M.D. and Kellogg, E.A. (2005). The genetic basis for inflorescence variation between foxtail and green millet (Poaceae). Genetics 169: 1659-1672.**

Google Scholar: [Author Only](#) [Title Only](#) [Author and Title](#)

**Doust, A.N. and Kellogg, E.A. (2002). Inflorescence diversification in the panicoid "bristle grass" clade (Paniceae, Poaceae): evidence from molecular phylogenies and developmental morphology. Am. J. Bot. 89: 1203-1222.**

Google Scholar: [Author Only](#) [Title Only](#) [Author and Title](#)

**Eveland, A.L., Goldschmidt, A., Pautler, M., Morohashi, K., Liseron-Monfils, C., Lewis, M.W., Kumari, S., Hiraga, S., Yang, F., Unger-Wallace, E., Olson, A., Hake, S., Vollbrecht, E., Grotewold, E., Ware, D. and Jackson, D. (2014). Regulatory modules controlling maize inflorescence architecture. Genome Res. 24: 431-443.**

Google Scholar: [Author Only](#) [Title Only](#) [Author and Title](#)

**Frame, B.R., Zhang, H., Cocciolone, S.M., Sidorenko, L.V., Dietrich, C.R., Pegg, S.E., Zhen, S., Schnable, P.S., and Wang, K. (2000) Production of transgenic maize from bombarded type II callus: Effect of gold particle size and callus morphology on transformation efficiency. In Vitro Cell. Dev. Biol.-Plant 36: 21-29.**

Google Scholar: [Author Only](#) [Title Only](#) [Author and Title](#)

**Gallavotti, A Long, J.A., Stanfield, S., Yang, X., Jackson, D., Vollbrecht, E., and Schmidt, R.J. (2010). The control of axillary meristem fate in the maize ramosa pathway. Development 137: 2849-2856.**

Google Scholar: [Author Only](#) [Title Only](#) [Author and Title](#)

**Gallavotti, A, Yang, Y., Schmidt, R.J. and Jackson D. (2008). The relationship between auxin transport and maize branching. Plant Physiol. 147: 1913-1923.**

Google Scholar: [Author Only](#) [Title Only](#) [Author and Title](#)

**Galli, M., Feng, F. and Gallavotti, A. (2020) Mapping regulatory determinants in plants. Front. Genet. 11: 591194.**

Google Scholar: [Author Only](#) [Title Only](#) [Author and Title](#)

**Galli, M., Khakhar, A., Lu, Z., Chen, Z., Sen, S., Joshi, T., Nemhauser, J.L., Schmitz, R.J. and Gallavotti, A. (2018). The DNA binding landscape of the maize AUXIN RESPONSE FACTOR family. Nat. Commun. 9: 4526.**

Google Scholar: [Author Only](#) [Title Only](#) [Author and Title](#)

- Grant, C.E., Bailey, T.L. and Noble, W.S. (2011).** FIMO: scanning for occurrences of a given motif. *Bioinformatics* 27: 1017-1018.  
Google Scholar: [Author Only](#) [Title Only](#) [Author and Title](#)
- Harlan, J.R. and de Wet, J.M.J. (1972).** A simplified classification of cultivated sorghum. *Crop Sci.* 12: 172-176.  
Google Scholar: [Author Only](#) [Title Only](#) [Author and Title](#)
- Hiratsu, K., Mitsuda, N., Matsui, K. and Ohme-Takagi, M. (2004).** Identificaiton of the minimal repression domain of SUPERMAN shows that the DLELRL hexapeptide is both necessary and sufficient for repression of transcription in Arabidopsis. *Biochem Biophys Res Commun.* 321: 172-178.  
Google Scholar: [Author Only](#) [Title Only](#) [Author and Title](#)
- Hodge, J.G. and Doust, A.N. (2017).** Morphological development of *Setaria viridis* from germination to flowering. *Plant Genet. Genomics* 19: 161-175.  
Google Scholar: [Author Only](#) [Title Only](#) [Author and Title](#)
- Huang, P. and Feldman, M. (2017)** Genetic Diversity and Geographic Distribution of North American *Setaria viridis* Populations, in *Genetics and Genomics of Setaria*. Cham, Switz,: Springer.  
Google Scholar: [Author Only](#) [Title Only](#) [Author and Title](#)
- Jackson, D., Veit, B. and Hake, S. (1994).** Expression of maize KNOTTED1 related homeobox genes in the shoot apical meristem predicts patterns of morphogenesis in the vegetative shoot. *Development* 120: 405-413.  
Google Scholar: [Author Only](#) [Title Only](#) [Author and Title](#)
- Kellogg, E.A (2015).** Flowering Plants, Monocots: Poaceae, Vol 13. Families and Genera of Vascular Plants. Cham, Switz,,: Springer.  
Google Scholar: [Author Only](#) [Title Only](#) [Author and Title](#)
- Kellogg, E.A., Camara, P.E.A.S, Rudall, P.J., Ladd, P., Malcomber, S.T., Whipple, C.J. and Doust, A.N. (2013).** Early inflorescence development in the grasses (Poaceae). *Front Plant Sci* 4: 250.  
Google Scholar: [Author Only](#) [Title Only](#) [Author and Title](#)
- Komari T., Takakura Y., Ueki J., Kato N., Ishida Y. and Hiei Y. (2006)** Binary Vectors and Super-binary Vectors. In: Wang K. (eds) *Agrobacterium Protocols. Methods in Molecular Biology*, vol 343. Humana Press.  
Google Scholar: [Author Only](#) [Title Only](#) [Author and Title](#)
- Kusters, E., Della Pina, S., Castel, R., Souer, E. and Koes, R. (2015).** Chances in cis-regulatory elements of key floral regulators are associated with divergence of inflorescence architectures. *Development* 142: 2822-2831.  
Google Scholar: [Author Only](#) [Title Only](#) [Author and Title](#)
- Leiboff, S. and Hake, S. (2019)** Reconstructing the transcriptional ontogeny of maize and sorghum supports an inverse hourglass model of inflorescence development. *Curr Biol.* 29: 3410-3419.  
Google Scholar: [Author Only](#) [Title Only](#) [Author and Title](#)
- Lemmon, Z.H., Park, S.J., Jiang, K., Van Eck, J., Schatz, M.C. and Lippman, Z.B. (2016)** The evolution of inflorescence diversity in the nightshades and heterochrony during meristem maturation. *Genome Res* 26: 1676-1686.  
Google Scholar: [Author Only](#) [Title Only](#) [Author and Title](#)
- Li, M., Shao, M.R., Zeng, D., Ju, T., Kellogg, E.A and Topp, C.N. (2020).** Comprehensive 3D phenotyping reveals continuous morphological variation across genetically diverse sorghum inflorescences. *New Phytol.* doi:10.1111/nph.16533.  
Google Scholar: [Author Only](#) [Title Only](#) [Author and Title](#)
- Liu, X., Galli, M., Camehl, I. and Gallavotti, A (2019).** RAMOSA1 ENHANCER LOCUS2-mediated transcriptional repression regulates vegetative and reproductive architecture. *Plant Physiol.* 179: 348-363.  
Google Scholar: [Author Only](#) [Title Only](#) [Author and Title](#)
- Lu, Z., Marand, A.P., Ricci, W.A, Ethridge, C.L., Zhang, X. and Schmitz, R.J. (2019).** The prevalence, evolution and chromatin signatures of plant regulatory elements. *Nat. Plants* 5: 1250-1259.  
Google Scholar: [Author Only](#) [Title Only](#) [Author and Title](#)
- Maizel, A., Busch, M.A, Tanahashi, T., Perkovic, J., Kato, M., Hasebe, M. and Weigel, D. (2005).** The floral regulator LEAFY evolves by substitutions in the DNA binding domain. *Science* 308: 260-263.  
Google Scholar: [Author Only](#) [Title Only](#) [Author and Title](#)
- Mitros, T., Session, A.M., James, B.T., Wu, G.A, Belaffif, M.B., Clark, L.V., Shu, S., Dong, H., Barling, A., Holmes, J.R., et al. (2020).** Genome biology of the paleotetraploid perennial biomass crop *Miscanthus*. *Nat. Commun.* 11: 5442.  
Google Scholar: [Author Only](#) [Title Only](#) [Author and Title](#)
- Nikolov, L.A and Tsiantis, M. (2015).** Interspecies gene transfer as a method for understanding the genetic basis for evolutionary change: progress, pitfalls and prospects. *Front Plant Sci* 6: 1135.  
Google Scholar: [Author Only](#) [Title Only](#) [Author and Title](#)

**Perez-Limón, S., Li, M., Cintora-Martinez, C., Aguilar-Rangel, M.R., Salazar-Vidal, M.N., González-Segovia, E., Blöcher-Juárez, K., Guerrero-Zavala, A., Barrales-Gomez, B., Caracaño-Macias, J., et al. (2021). A B73**

**x Palomero Toluqueño mapping population reveals local adaptation in Mexican highland maize. bioRxiv doi: <https://doi.org/10.1101/2021.09.15.460568>**

Google Scholar: [Author Only Title Only Author and Title](#)

**Prusinkiewicz, P., Erasmus, Y., Lane, B., Harder, L.D. and Coen, E. (2007). Evolution and development of inflorescence architectures. *Science* 316: 1452-1456.**

Google Scholar: [Author Only Title Only Author and Title](#)

**Upadyayula, N., da Silva, H.S., Bohn, M.O. and Rocheford, T.R. (2006a). Genetic and QTL analysis of maize tassel and ear inflorescence architecture. *Theor App Genet* 112: 592-606.**

Google Scholar: [Author Only Title Only Author and Title](#)

**Upadyayula, N., Wassom, J., Bohn, M.O. and Rocheford, T.R. (2006b). Quantitative trait loci analysis of phenotypic traits and principle components of maize tassel inflorescence architecture. *Theor App Genet* 113: 1395-1407.**

Google Scholar: [Author Only Title Only Author and Title](#)

**Ricci, W.A., Lu, Z., Ji, L., Marand, A.P., Ethridge, C.L., Murphy, N.G., Noshay, J.M., Galli, M., Mejía-Guerra, M.K. Colomé-Tatché, M., et al. (2019). Widespread long-range cis-regulatory elements in the maize genome. *Nat. Plants* 5: 1237-1249.**

Google Scholar: [Author Only Title Only Author and Title](#)

**Satoh-Nagasawa, N., Nagasawa, N., Malcomber, S., Sakai, H. and Jackson, D. (2006). A trehalose metabolic enzyme controls inflorescence architecture in maize. *Nature*. 441: 227-230.**

Google Scholar: [Author Only Title Only Author and Title](#)

**Sayou, C., Monniaux, M., Nanao, M.H., Moyroud, E., Brockington, S.F., Thévenon, E., Chahtane, H., Warthmann, N., Melkonian, M., Zhang, Y., Wong, G.K.S., Weigel, D., Parcy, F. and Dumas, R. (2014). A promiscuous intermediate underlies the evolution of LEAFY DNA binding specificity. 343: 645-648.**

Google Scholar: [Author Only Title Only Author and Title](#)

**Schnable, J.C. (2015). Genome evolution in maize: from genomes back to genes. *Annu Rev Plant Biol.* 66: 329-343.**

Google Scholar: [Author Only Title Only Author and Title](#)

**Schnable, J. (2019). Grass Syntenic Gene List sorghum v3 maize v3/4 with teff and oropetium v2. Figshare. Available at: [https://figshare.com/articles/Grass\\_-](https://figshare.com/articles/Grass_-)**

Google Scholar: [Author Only Title Only Author and Title](#)

**[Syntenic\\_Gene\\_List\\_sorghum\\_v3\\_maize\\_v3\\_4\\_with\\_teff\\_and\\_oropetium\\_v2/7926674/1](#)**

**Schnable, J.C. and Freeling, M. (2011). Genes identified by visible mutant phenotypes show increased bias toward one of two subgenomes of maize. *PLoS ONE* 6: e17855.**

Google Scholar: [Author Only Title Only Author and Title](#)

**Sigmon, B.A (2010). *ramosa1* in the development and evolution of inflorescence architecture in grasses. PhD dissertation. Iowa State University, Ames, IA**

Google Scholar: [Author Only Title Only Author and Title](#)

**Sigmon, B. and Vollbrecht, E. (2010). Evidence of selection at the *ramosa1* locus during maize domestication. *Mol Ecol* 19: 1296-1311.**

Google Scholar: [Author Only Title Only Author and Title](#)

**Strable, J. and Vollbrecht, E. (2019). Maize YABBY genes drooping leaf1 and drooping leaf2 regulate floret development and floral meristem determinacy. *Development* 146: dev171181.**

Google Scholar: [Author Only Title Only Author and Title](#)

**Strable, J., Wallace, J.G., Unger-Wallace, E., Briggs, S., Bradbury, P., Buckler, E.S. and Vollbrecht, E. (2017). Maize YABBY Genes drooping leaf1 and drooping leaf2 regulating plant architecture. *Plant Cell* 29: 1622-1641.**

Google Scholar: [Author Only Title Only Author and Title](#)

**Studer, A., Zhao, Q., Ross-Ibarra, J., Doebley, J. (2011). Identification of a functional transposon insertion in the maize domestication gene *tb1*. *Nat Genet* 43: 1160-1163.**

Google Scholar: [Author Only Title Only Author and Title](#)

**Swigoňová, Z., Lai, J., Ma, J., Ramakrishna, W., Llaca, V., Bennetzen, J.L. and Messing, J. (2004). Close split of sorghum and maize genome progenitors. *Genome Res.* 14: 1916-1923.**

Google Scholar: [Author Only Title Only Author and Title](#)

**Tiwari, S.B., Hagen, G. and Guilfoyle, T.J. (2004). Aux/IAA proteins contain a potent transcriptional repression domain. *Plant Cell* 16: 533-543.**

Google Scholar: [Author Only](#) [Title Only](#) [Author and Title](#)

**Vollbrecht, E. and Schmidt, R.J. (2009).** Development of the inflorescences. In: *Handbook of Maize: Its Biology*. Springer, N.Y. pp. 13-40.

Google Scholar: [Author Only](#) [Title Only](#) [Author and Title](#)

**Vollbrecht, E., Springer, P.S., Goh, L., Buckler, E.S. and Martienssen, R. (2005).** Architecture of floral branch systems in maize and related grasses. *Nature* 436: 1119-1126.

Google Scholar: [Author Only](#) [Title Only](#) [Author and Title](#)

**Wang, B., Regulsky, M., Tseng, E., Olson, A., Goodwin, S., McCombie, W.R. and Ware, D. (2018).** A comparative transcriptional landscape of maize and sorghum obtained by single-molecule sequencing. *Genome Res.* 28: 921-932.

Google Scholar: [Author Only](#) [Title Only](#) [Author and Title](#)

**Wang, H., Nussbaum-Wagler, T., Li, B., Zhao, Q., Vigouroux, Y., Faller, M., Bomblies, K., Lukens, L. and Doebley, J.F. (2005).** The origin of the naked grains of maize. *Nature* 436: 714-719.

Google Scholar: [Author Only](#) [Title Only](#) [Author and Title](#)

**Weeks, B.L. (2013).** Inflorescence branching in maize: a quantitative genetics approach to identifying key players in the inflorescence development pathway. PhD dissertation. Iowa State University, Ames, IA

Google Scholar: [Author Only](#) [Title Only](#) [Author and Title](#)

**Whipple, C.J. (2017).** Grass inflorescence architecture and evolution: the origin of novel signaling centers. *New Phytol.* 216: 367-372.

Google Scholar: [Author Only](#) [Title Only](#) [Author and Title](#)

**Whipple, C.J., Hall, D.H., DeBlasio, S., Taguchi-Shiobara, F., Schmidt, R.J. and Jackson, D.P. (2010).** A conserved mechanism of bract suppression in the grass family. *Plant Cell* 22: 565-578.

Google Scholar: [Author Only](#) [Title Only](#) [Author and Title](#)

**William, D.A., Su, Y., Smith, M.R., Lu, M., Baldwin, D.A. and Wagner, D. (2004).** Genomic identification of direct target genes of LEAFY. *Proc Natl Acad Sci USA* 101: 1775-1780.

Google Scholar: [Author Only](#) [Title Only](#) [Author and Title](#)

**Wills, D.M., Whipple, C.J., Takuno, S., Kursel, L.E., Shannon, L.M., Ross-Ibarra, J. and Doebley, J.F. (2013).** From many, one: genetic control of prolificacy during maize domestication. *PLoS Genet.* 9: e1003604.

Google Scholar: [Author Only](#) [Title Only](#) [Author and Title](#)

**Winter, C.M., Austin, R.S., Blanvillain-Baufumé, S., Reback, M.A., Monniaux, M., Wu, M.F., Sang, Y., Yamaguchi, A., Yamaguchi, N., Parker, J.E., et al. (2011).** LEAFY target genes reveal floral regulatory logic, cis motifs, and a link to biotic stimulus response. *Dev Cell* 20: 430-443.

Google Scholar: [Author Only](#) [Title Only](#) [Author and Title](#)

**Wu, X., Li, Y., Shi, Y., Song, Y., Zhang, D., Li, C., Buckler, E.S., Li, Y., Zhang, Z. and Wang, T. (2016).** Joint linkage mapping and GWAS reveal extensive genetic loci that regulate male inflorescence size in maize. *Plant Biotechnol J* 14: 1551-1562.

Google Scholar: [Author Only](#) [Title Only](#) [Author and Title](#)

**Xu, G., Wang, X., Huang, C., Xu, D., Li, D., Tian, J., Chen, Q., Wang, C., Liang, Y., Wu, Y., Yang, X. and Tian, F. (2017).** Complex genetic architecture underlies maize tassel domestication. *New Phytol.* 214: 852-864.

Google Scholar: [Author Only](#) [Title Only](#) [Author and Title](#)

**Yamaki, S., Miyabayashi, T., Eiguchi, M., Kitano, H., Nonomura, K.I. and Kurata, N. (2010).** Diversity of panicle branching patterns of wild relatives of rice. *Breeding Sci* 60: 586-596.

Google Scholar: [Author Only](#) [Title Only](#) [Author and Title](#)

**Zhang, G., Liu, X., Quan, Z., Cheng, S., Xu, X., Pan, S., Xie, M., Zeng, P., Yue, Z., Wang, W., et al. (2012).** Genome sequence of foxtail millet (*Setaria italica*) provides insights into grass evolution and biofuel potential. *Nat Biotechnol.* 30: 549-554.

Google Scholar: [Author Only](#) [Title Only](#) [Author and Title](#)

**Zhou, Y., Srinivasan, S., Mirnezami, S.V., Kusmec, A., Fu, Q., Attigala, L., Salas Fernandes, M.G., Ganapathysubramanian, B. and Schnable, P.S. (2019).** Semiautomated feature extraction from RGB images for Sorghum panicle architecture GWAS. *Plant Physiol.* 179: 24-37.

Google Scholar: [Author Only](#) [Title Only](#) [Author and Title](#)

**Zhu, C., Yang, J., Box, M.S., Kellogg, E.A. and Eveland, A.L. (2018).** A dynamic co-expression map of early inflorescence development in *Setaria viridis* provides a resource for gene discovery and comparative genomics. *Front Plant Sci* 9: 1309.

Google Scholar: [Author Only](#) [Title Only](#) [Author and Title](#)
